- 1 **Prolonged disturbance of proteostasis induces cellular senescence via temporal mitochondrial**  
2 **dysfunction and enhanced mitochondrial biogenesis in human fibroblasts**  
3  
4 **Authors:** Yasuhiro Takenaka<sup>1,2</sup>, Ikuo Inoue<sup>2</sup>, Takanari Nakano<sup>3</sup>, Masaaki Ikeda<sup>4</sup>, Yoshihiko  
5 Kakinuma<sup>1</sup>  
6 **Affiliations:** <sup>1</sup>Department of Physiology, Graduate School of Medicine, Nippon Medical School,  
7 Tokyo, Japan  
8 <sup>2</sup>Department of Diabetes and Endocrinology, Saitama Medical University, Saitama, Japan  
9 <sup>3</sup>Department of Biochemistry, Saitama Medical University, Saitama, Japan  
10 <sup>4</sup>Department of Physiology, Saitama Medical University, Saitama, Japan  
11  
12 Correspondence  
13 Yasuhiro Takenaka, PhD, Department of Physiology, Graduate School of Medicine, Nippon Medical  
14 School, Sendagi, Bunkyo-ku, Tokyo 113-8602, Japan, E-mail: yasuhito-takenaka@nms.ac.jp  
15 **Key words:** aging, mitochondria, oxidative stress, proteasome, lysosome, DNA damage response

16 **Abstract**

17 **Proteolytic activities decline with age, resulting in the accumulation of aggregated proteins in**  
18 **aged organisms. To investigate how disturbance of proteostasis causes cellular senescence in**  
19 **proliferating cells, we developed a stress-induced premature senescence (SIPS) model, in which**  
20 **normal human fibroblast MRC-5 cells were treated with either the proteasome inhibitor**  
21 **MG132 or V-ATPase inhibitor bafilomycin A1 (BAFA1). After 5 days of drug treatment, cells**  
22 **showed morphological and functional changes associated with aging along with DNA damage**  
23 **response. Time-course studies revealed significant increase in intracellular and mitochondrial**  
24 **reactive oxygen species (ROS) during and after drug treatment. We also found temporal**  
25 **downregulation of mitochondrial membrane potential during drug treatment, followed by an**  
26 **increase in mitochondrial mass, especially after drug treatment. Notable upregulation of**  
27 **PGC-1 $\alpha$  and TFAM proteins confirmed enhanced mitochondrial biogenesis. Furthermore, the**  
28 **protein levels of SOD2 and GPx4, mitochondrial antioxidant enzymes, in the mitochondrial**  
29 **fraction were specifically reduced on day 1 of the treatment. Co-treatment with rapamycin**  
30 **along with MG132 or BAFA1 partially attenuated induction of SIPS by suppressing**  
31 **generation of excess ROS and mitochondrial biogenesis. In conclusion, the present study**

32 revealed that disturbance of proteostasis by the inhibitors changes the distribution of  
33 nuclear-encoded mitochondrial antioxidant enzymes at an early period of the treatment, which  
34 induces mitochondrial ROS and temporal mitochondrial dysfunction. ROS in turn activates  
35 stress responses pathways, followed by PGC-1 $\alpha$ -mediated mitochondrial biogenesis. Hence, the  
36 excessive ROS continuously generated by increased mitochondria can cause deleterious  
37 damage to nuclear DNA, cell cycle arrest, and eventual cellular senescence.

38

39

40

41 **Introduction**

42 Proteolytic activities and the rate of protein turnover decline in aged animals [1, 2] and humans [3].  
43 The decline of proteostasis causes intracellular accumulation of crosslinked protein aggregates [4]  
44 and/or autofluorescent materials called lipofuscin [5] that are prominent markers for cellular  
45 senescence. Cellular senescence is characterized by permanent cell cycle arrest, morphological  
46 changes such as flattened cellular shape, increased levels of lysosome, upregulation of  
47 cyclin-dependent kinase (CDK) inhibitors p16 and p21 [6], enhanced activity of mTOR pathway [7],  
48 occurrence of medium levels of p53 [8], and expression of senescence associated  $\beta$ -galactosidase  
49 (SA- $\beta$ -gal) [9]. Normal human fibroblasts, cultured *in vitro*, have limited proliferative capacity,  
50 which is known as the “Hayflick limit”. Limited replicative potential and occurrence of replicative  
51 senescence are considered to be caused by a shortened telomere that triggers a DNA damage  
52 response (DDR) and eventual irreversible cell cycle arrest. On the other hand, stress-induced  
53 premature senescence (SIPS) can be induced via several stressors in young proliferative cells that  
54 have long and functional telomeres. Several factors have been reported to serve as inducers of SIPS,  
55 including DNA damaging reagents [10], producers of reactive oxygen species (ROS), expression of  
56 oncogenic genes [11], and several proteasome inhibitors.

57                   MG132, a tripeptide aldehyde, is a reversible inhibitor of  $\beta$ 1 caspase-like,  $\beta$ 2 trypsin-like,  
58 and  $\beta$ 5 chymotrypsin-like activities of 20S proteasome. At a high dose, MG132 increases ROS  
59 levels and GSH depletion in human pulmonary fibroblasts [12], Chinese hamster ovary cells [13],  
60 and human leukemic cells [14], which results in cell death. When human fibroblasts, including  
61 MRC-5 cells, are treated with a low dose of MG132 for a long period, irreversible growth arrest and  
62 premature senescence can be observed [15-17]. This indicates that prolonged disturbance of  
63 proteostasis could cause premature senescence by a stress. However, the exact mechanisms  
64 underlying SIPS caused by proteasome inhibitors are unknown.

65                   Mitochondria are the central organelles responsible for ATP generation as a source of  
66 energy supply in eukaryotic cells. During oxidative phosphorylation (OXPHOS) in mitochondria,  
67 electron transfer via an electron transport chain in complexes I and III can cause leakage of electrons  
68 [18], which is considered to be the major source of intracellular superoxide, hydrogen peroxide, and  
69 other downstream ROS such as hydroxyl radicals. The role of mitochondria in aging is more  
70 complicated. According to the mitochondrial free radical theory of aging, cumulative damages to  
71 mitochondrial DNA and proteins by ROS generated via OXPHOS hamper mitochondrial function  
72 and result in more ROS production [19]. This is a vicious cycle in which ROS causes successive

73 mitochondrial damage, and mitochondrial dysfunction in turn produces more ROS, eventually  
74 leading to cellular senescence. Thus, accumulation of dysfunctional mitochondria seems to be one of  
75 the hallmarks in senescent cells. Moreover, increase in mitochondrial mass occurs in fibroblasts that  
76 undergo replicative senescence [20], SIPS [20, 21], and oncogene-induced senescence [11]. In many  
77 cases, accumulated mitochondria in senescent cells also show decreased mitochondrial membrane  
78 potential, which indicates mitochondrial dysfunction and increased ROS production, although the  
79 levels of mitochondrial superoxide and hydrogen peroxide increase or decrease is dependent on the  
80 cause of the dysfunction [18].

81           In this study, we investigated the mechanisms underlying the induction of premature  
82 senescence in young human fibroblast MRC-5 cells that show Hayflick limit at around 60 population  
83 doubling level (PDL), by prolonged treatment with MG132 or bafilomycin A1 (BAFA1). BAFA1, a  
84 plecomacrolide, is a specific and potent inhibitor of vacuolar-type ATPases (V-ATPases), a proton  
85 pump that acidifies lysosomes, which subsequently inhibit lysosomal degradation of biomolecules  
86 from several clearance pathways, including macroautophagy and mitophagy [22]. In the current  
87 study, both MG132 and BAFA1 impaired cellular proteostasis and induced premature senescence in  
88 MRC-5 cells in a similar manner, although the target molecules of the two drugs are different. To

89 elucidate the exact mechanisms of SIPS by these drugs, we performed time-course studies on  
90 senescence-associated markers, ROS, DDR, and mitochondrial function and biogenesis during and  
91 after treatment with MG132 and BAFA1. We demonstrated that the initial loss of mitochondrial  
92 functions is possibly caused by temporal depletion of mitochondrial antioxidant proteins and  
93 sequential increase in mitochondrial ROS, which in turn could induce mitochondrial biogenesis,  
94 excess production of intracellular ROS, DDR, and eventual cellular senescence.

95

## 96 **Results**

### 97 **Prolonged disturbance of proteostasis by MG132 or BAFA1 induces cell cycle arrest, DNA** 98 **damage response, and SIPS in early passage human fibroblasts**

99 To elucidate how prolonged inhibition of proteostasis induces premature senescence in fibroblasts,  
100 we first established a MG132- or BAFA1-induced cellular senescence model. We exposed normal  
101 human fibroblast MRC-5 cells (36-39 PDL) to low concentration of MG132 (0.1  $\mu$ M) or BAFA1 (4  
102 nM) for 3 or 5 days (Fig. 1A). During MG132 or BAFA1 treatment for 5 consecutive days, the cells  
103 almost stopped proliferation and acquired thin needle-like morphology (Fig. S1A, day 3). When the  
104 culture medium was returned to the regular medium without the inhibitor (Fig. 1A), sustained

105 growth arrest was observed (Fig. 1B). After drug removal, the cells gradually changed in  
106 morphology, that is, to enlarged flat shape at around 3-4 post-treatment days (PD)(Fig. S1A, PD5),  
107 which generally occurs during senescence. However, when cells were treated with the same  
108 concentration of MG132 or BAFA1 for 3 consecutive days, proliferation was resumed after drug  
109 removal (Fig. 1B). Induction of SIPS was also evaluated by conventional SA- $\beta$ -gal staining and  
110 cell-based microplate assay using SPiDER- $\beta$ Gal, a fluorogenic substrate for  $\beta$ -galactosidase. In cells  
111 treated with either of the drugs for 5 consecutive days, SA- $\beta$ -gal-positive cells were clearly observed  
112 at PD7; whereas no such cells were observed when treated for 3 days (Fig. 1C). Therefore, we  
113 performed a 5-day treatment with either of the drugs for all the experiments discussed further in this  
114 report. Cell-based assay for SA- $\beta$ -gal activity confirmed significant increase in the activity in cells at  
115 PD3 and PD6 after treatment with MG132 (Fig. 1D, left) and BAFA1 (Fig. 1D, right) for 5 days. We  
116 also observed remarkable increase in aggresome-like inclusion bodies that were morphologically  
117 similar to those in cells undergoing replicative senescence (58 PDL) as early as day 1 of treatment  
118 with MG132 or BAFA1 (Fig. 1E). The aggregates were detectable even at PD6.

119 Further, we investigated the induction of DDR by monitoring the expression of activated  
120 H2AX ( $\gamma$ H2A.X) during and after treatment of MG132 or BAFA1. DNA damage foci were



121 observed in nuclei of cells at PD5 (Fig. 1F). In immunoblot analyses, protein levels of  $\gamma$ H2A.X were  
122 relatively repressed during treatment but increased after the drug removal in both drug-treated cells  
123 (Fig. 1G). We also performed time-course analyses of senescence-associated marker proteins. CDK  
124 inhibitor p21 levels were increased as early as day 1 and remained predominantly the same thereafter,  
125 indicating prompt and sustained cell cycle arrest (Fig. 1G). Prolonged and low-level expression of  
126 p53, which is one of the hallmarks of cellular senescence [8], was also detected during and after drug  
127 treatments. The p21 and p53 levels were comparable to control MRC-5 cells that underwent  
128 replicative senescence (Fig. S1B, 55 and 60 PDL). Sustained activation of mTOR has been reported  
129 to be required for cellular senescence [23, 24]. Phosphorylated ribosomal protein S6 (p-S6), a target  
130 of mTORC1, depleted once during drug treatment, but recovered to the initial level (control) after  
131 the treatment (Fig. 1G), indicating restoration of the growth signal in cells that ceased to proliferate  
132 (Fig. 1B). Both NRF1 and NRF2, NF-E2-related factor 1 and 2 respectively, were transiently  
133 upregulated at a very early period of MG132 treatment (Fig. 1H), but depleted thereafter (Fig. S2A).  
134 In BAF1-treated cells, very weak induction of NRF1 and NRF2 at 48 hrs was observed (Fig. 1I).  
135 We also investigated metabolic remodeling as seen in some senescent cells, which showed  
136 upregulation of both OXPHOS and glycolysis [25]. The protein levels of glucose transporter GLUT1

137 and HIF-1 $\alpha$  that induces several glycolytic proteins did not increase in MG132- and BAFA1-treated  
138 cells (Fig. S2B), implying that there was no shift toward glycolysis in our SIPS model.

139 We have also tested for SIPS induction in rat H9c2 myoblasts by MG132 or BAFA1 with  
140 the same treatment regimen as adopted in MRC-5 cells, which demonstrated that SIPS induction by  
141 these inhibitors is not a specific feature of human fibroblasts (data not shown).

142

143 **Prolonged treatment of MG132 or BAFA1 increases intracellular ROS, H<sub>2</sub>O<sub>2</sub>, and**  
144 **mitochondrial ROS, but not NO**

145 Treatment of cells with various doses (1-30  $\mu$ M) of MG132 increases intracellular ROS [12, 26] and  
146 NO production [14], but the kinetics of ROS/NO production in fibroblasts during and after longer  
147 treatment with MG132 or BAFA1 is unknown. During MG132 or BAFA1 treatment, intracellular  
148 H<sub>2</sub>O<sub>2</sub> and hydroxyl radical (OH) levels detected by HYDROP and OxiORANGE, respectively, did  
149 not increase on day 1 but gradually increased from day 3. From PD1 to PD5, hydroxyl radical (Fig.  
150 2A and 2B) and H<sub>2</sub>O<sub>2</sub> (Fig. 2C and 2D) levels were still higher than that of control cells.  
151 Contrastingly, NO levels detected by DAF-FM DA fluorescent dye remained largely unchanged or  
152 slightly reduced during and after treatments with either drug (Fig. S3). There was no increase in

153 mRNA and protein levels of inducible NOS (data not shown), which confirmed that NO was not the  
154 cause of senescence induction in MG132- and BAF A1-treated cells.

155 To reveal the involvement of mitochondria in an increased production of intracellular  
156 ROS in MG132- or BAF A1-treated cells, we assessed mitochondrial ROS levels using MitoSOX  
157 superoxide indicator. Mitochondrial ROS levels significantly increased in both MG132- and  
158 BAF A1-treated cells as early as day 1 of the treatment and peaked at PD3 (Fig. 2E and 2F).

159

#### 160 **Prolonged treatment of MG132 or BAF A1 enhances mitochondrial biogenesis**

161 We next investigated changes in mitochondrial mass and mitochondrial membrane potential ( $\Delta\psi_m$ )  
162 using MitoTracker Green FM and MitoTracker Red CM-H2Xros, respectively. In either drug-treated  
163 cells, mitochondrial mass gradually increased during treatment and remained at high levels even  
164 after treatment (Fig. 3A and 3C, mitochondrial mass (Mt mass)). Contrarily, the mitochondrial  
165 membrane potential increased once on day 1, compared with untreated control cells, but slightly  
166 decreased on days 3 and 5, and markedly increased thereafter (Fig. 3B and 3C,  $\Delta\psi_m$ ).  
167 Mitochondrial proliferation was also confirmed by qPCR analyses of mitochondrial DNA (mtDNA)  
168 copy number (Fig. 3D). Intracellular ATP were almost at basal levels during treatment, but increased

169 thereafter (Fig. 3E), which may reflect the restoration of mitochondrial membrane potential after  
170 drug treatment. These results suggest temporal mitochondrial dysfunction during drug treatment but  
171 accumulation of functional mitochondria, probably by mitochondrial biogenesis, thereafter.

172           We further explored how mitochondrial mass increased in MG132- or BAFA1-treated  
173 cells by assessing protein expression of key factors in mitochondrial biogenesis and clearance.  
174 PGC-1 $\alpha$ , the master regulator of mitochondrial biogenesis, was upregulated temporarily from day 3  
175 to PD1 with different kinetics between MG132 and BAFA1, but downregulated thereafter (Fig. 3F).  
176 In contrast, TFAM, the key mitochondrial transcription activator, was consistently elevated during  
177 and after treatment. Upregulation of these factors indicated enhanced mitochondrial biogenesis in  
178 MG132- and BAFA1-treated cells. Furthermore, Parkin, the ubiquitin ligase that is responsible for  
179 mitophagy, was largely downregulated below basal levels, indicating suppression of mitophagic flux  
180 during and after treatment. We also found that AMP-activated protein kinase alpha (AMPK $\alpha$ ) was  
181 remarkably activated, especially on days 3 and 5 (Fig. 3F), which is consistent with increase in  
182 intracellular ATP levels in post-treatment periods (Fig. 3E). Increase in cytochrome c oxidase  
183 subunit 4 (COX4) levels also confirmed an increase in mitochondrial mass in MG132- and  
184 BAFA1-treated cells.

185

186 **MG132- or BAF1- treatment causes reduction in mitochondrial antioxidant proteins in**  
187 **mitochondrial fraction during the early period of treatment**

188 Recently, mass spectrometry analysis revealed aggregation of nuclear-encoded mitochondrial  
189 proteins such as respiratory chain complex subunits as an early event in MG132-treated cells [27]. In  
190 our experiments, mitochondrial ROS was significantly increased in MG132- or BAF1-treated cells  
191 as early as day 1 compared with untreated control cells (Fig. 2E), implying that enhanced ROS  
192 generation and/or failure to scavenge ROS occur in the mitochondria immediately after initiation of  
193 drug treatment. Thus, we investigated protein levels of two mitochondrial antioxidant enzymes,  
194 superoxide dismutase (SOD2) and glutathione peroxidase (GPx4), in biochemically isolated  
195 mitochondrial fraction (detailed method in Fig. S4A) of MG132- or BAF1-treated cells. On day 1,  
196 SOD2 was depleted specifically in mitochondrial fraction (Fig. 4A, Mt) in either drug-treated cells  
197 although the overall SOD2 level was almost constant or slightly increased compared with control  
198 cells (Fig. 4A, whole). From day 3, whole and mitochondrial SOD2 levels notably increased.  
199 Similarly, GPx4 in mitochondrial fraction was also depleted on day 1 and induced thereafter. We  
200 also observed reduction in NDUFS3, NADH dehydrogenase ubiquinone iron-sulfur protein 3 of

201 respiratory complex 1, in mitochondrial fraction on day 1, which was in accordance with results  
202 from mass spectrometry analysis and observation of Ndufs3-EGFP localization in MG132-treated  
203 cells, reported in a previous study [27]. In contrast, the protein levels of Tom40 and GAPDH in  
204 mitochondrial fraction remained largely unchanged in either drug-treated cells. We also observed  
205 accumulation of aggregate-like particles of SOD2 in the cytoplasm of either MG132- or  
206 BAFA1-treated cells on day 1 (Fig. 4B). These results suggest that antioxidant enzymes could form  
207 aggregates before translocation into mitochondria, as an early event of disturbance of proteostasis,  
208 which eventually reduces mitochondrial ROS-scavenging efficiency.

209

#### 210 **Rapamycin treatment partially attenuates cellular senescence induced by MG132 or BAFA1**

211 Mitochondrial function and biogenesis are controlled by mTOR [28]. Inhibition of mTOR by  
212 rapamycin, a mTORC1 inhibitor, resulted in a decrease in mitochondrial oxidative function [29],  
213 mitochondrial ROS [30], and senescence induction [31-33]. To further investigate the involvement  
214 of mitochondrial biogenesis in our SIPS model, we co-treated cells with rapamycin and either  
215 MG132 or BAFA1. In the case of 5 days co-treatment with rapamycin and MG132 or BAFA1 from  
216 day 0 (Fig. 5A, Rapa1), cells recovered proliferation potential after PD5 (Fig. 5B). In contrast, poor

217 growth was observed in cells co-treated for 2 days from day 3 and additionally treated with only  
218 rapamycin for 3 days from PD1 (Fig. 5A and 5B, Rapa2). The effects of rapamycin on SIPS were  
219 also confirmed by SA- $\beta$ -gal activity (Fig. 5C and S5) and intracellular H<sub>2</sub>O<sub>2</sub> levels (Fig. 5D and 5E)  
220 in both MG132- and BAFA1-treated cells. Furthermore, an increase in mitochondrial mass, assessed  
221 by MitoTracker Green, was significantly repressed by co-treatment with rapamycin and either  
222 MG132 (Rapa1) or BAFA1 (Rapa1 and Rapa2) (Fig. 5F). Different profiles of proliferative potential,  
223 H<sub>2</sub>O<sub>2</sub> levels, and mitochondrial mass between Rapa1 and Rapa2 suggested that cellular events during  
224 the early period (days 0-3) of drug treatment intensively affect the following SIPS progression. Thus,  
225 we further analyzed rapamycin effect on ROS production during early period (days 1-2) of the  
226 treatment. Mitochondrial ROS significantly decreased by co-treatment with rapamycin on day 1  
227 (MG132) or day 2 (BAFA1) compared with cells only treated with either MG132 or BAFA1 (Fig.  
228 5G). Furthermore, protein contents of SOD2 in both whole and mitochondrial fractions increased in  
229 cells co-treated with rapamycin and BAFA1, whereas those of GPx4 increased in cells co-treated  
230 with rapamycin and MG132 (Fig. 5H), showing an accelerated upregulation and proper translocation  
231 of mitochondrial anti-oxidant enzymes by rapamycin co-treatment.

232 Further, we evaluated significance of ROS produced during the early period of treatment

233 in mitochondrial biogenesis. Cells were co-treated with *N*-acetyl-L-cysteine (NAC), a ROS  
234 scavenger, and either MG132 or BAFA1 for 2 days with 3 different starting dates (Fig. 6A,  
235 NAC1-3). In both MG132- and BAFA1-treated cells, co-treatment of NAC during the initial 2 days  
236 (NAC1) showed the highest suppression in the increase in mitochondrial mass at PD2 (Fig. 6B),  
237 implying that ROS produced during the early period (days 1-2) greatly triggered mitochondrial  
238 biogenesis.

239

## 240 **Discussion**

241 Previous studies have shown that SIPS is induced in human fibroblasts by treatment of proteasome  
242 inhibitors such as MG132 [15-17]. However, the exact mechanisms of SIPS induction by  
243 proteasome inhibition have not been clarified. In this study, we found that the prolonged disturbance  
244 of proteostasis by not only MG132 but also by BAFA1, an inhibitor of lysosome function, induces  
245 SIPS through early temporal mitochondrial dysfunction, sequential mitochondrial biogenesis that  
246 possibly enhances excess ROS production, and eventual DDR. Notably, SIPS by MG132 and  
247 BAFA1 showed similar phenotypes and kinetics of senescence-associated markers, mitochondrial  
248 dysfunction and biogenesis, ROS levels, and DDR, although these reagents inhibit different



249 molecules, chymotrypsin-like protease in 20S proteasome and proton pump V-ATPase on lysosome  
250 membrane, respectively. This implies the presence of shared mechanisms in SIPS induced by  
251 disturbance of proteostasis regardless of initial causes. Contrastingly, there are several differences  
252 between the profiles of SIPS by MG132 and BAFA1. For instance, the levels of SA- $\beta$ -gal activity,  
253 NRF1 and NRF2 induction, and mitochondrial biogenesis are relatively low in BAFA1-treated cells.  
254 In addition, the overall SIPS progression in BAFA1-treated cells seems to be slower than that  
255 observed in MG132-treated cells. Therefore, we could not exclude the occurrence of drug-specific  
256 induction mechanisms in our SIPS model.

257 Mitochondria are considered to be the main source of ROS generated in cells.  
258 Dysfunctional mitochondria that show decreased membrane potential and excess mitochondrial ROS  
259 accumulate in senescent cells [21, 34]. It has also been established that the mitochondrial mass [20,  
260 35] and OXPHOS activity [25] increase during cellular senescence. Thus, mitochondrial function  
261 and metabolism are the major determinants of cellular aging [19]. Based on our results, it is likely  
262 that there are two phases of mitochondrial status in which mitochondrial membrane potential only  
263 temporarily decreased during MG132 or BAFA1 treatment, but significantly increased thereafter  
264 (Fig. 3B) along with a significant increase in mitochondrial mass (Fig. 3A and 3D) and ATP levels

265 (Fig. 3E), suggesting an increase in functional mitochondria during the latter period of SIPS  
266 progression. Enhanced mitochondrial biogenesis was confirmed by notable increase in PGC-1 $\alpha$  and  
267 TFAM proteins (Fig. 3F) that were critically involved in mitochondrial biogenesis, whereas Parkin  
268 (Fig. 3F) and LC3-II (Fig. 1G) were greatly downregulated, implying that mitophagic flux was  
269 suppressed during enhanced mitochondrial biogenesis (day 5 to PD2). Furthermore, we observed  
270 depletion of antioxidant enzymes in mitochondrial fraction (Fig. 4A) and aggresome-like inclusions  
271 of SOD2 in the cytoplasm (Fig. 4B) as early as day 1, implying that nuclear-encoded antioxidant  
272 proteins were insufficiently translocated into the mitochondria.

273 Rapamycin treatment partially attenuates cellular senescence induced by MG132 or  
274 BAFA1 (Fig. 5B and 5C). Rapamycin treatment with MG132 or BAFA1 during days 0-5 (Rapa1)  
275 significantly suppressed intracellular H<sub>2</sub>O<sub>2</sub> (Fig. 5D and 5E), mitochondrial ROS production (Fig.  
276 5G), and mitochondrial biogenesis (Fig. 5F) compared with cells treated with only MG132 or  
277 BAFA1. The suppression of ROS by rapamycin could be partly because of enhanced upregulation of  
278 overall and mitochondrial levels of SOD2 (Fig. 5H, BAFA1) and GPx4 (Fig. 5H, MG132). We also  
279 found that co-treatment with NAC during days 1 and 2 (NAC1) significantly inhibited mitochondrial  
280 biogenesis (Fig. 6B). Taken together, it is likely that rapamycin attenuates MG132- or

281 BAF1A1-induced SIPS by repressing an initial increase in intracellular and mitochondrial ROS levels  
282 and the following mitochondrial biogenesis. On the contrary, immunoblot analyses revealed that an  
283 induction level of PGC-1 $\alpha$  was not altered by co-treatment with rapamycin compared to cells  
284 without rapamycin (Fig. S6). Notably, an active form of LC3, LC3-II, was not upregulated by  
285 rapamycin co-treatment (Fig. S6), implying that autophagic flux for damaged mitochondrial  
286 clearance does not contribute to rapamycin effect on SIPS. Thus, further investigation is required to  
287 clarify the detailed molecular link between suppression of ROS and mitochondrial biogenesis by  
288 rapamycin co-treatment.

289 Proteolytic activities and rate of protein turnover decline in aged organisms, which result  
290 in intracellular accumulation of insoluble protein aggregates. Whether age-related accumulation of  
291 protein aggregates is the determinant of cellular senescence or a characteristic product in aged cells  
292 still remains controversial. What is the link between protein aggregates observed in our SIPS model  
293 and cellular senescence? We found that aggregated proteins accumulated from day 1 by treatment  
294 with MG132 or BAF1A1 (Fig. 1E). Overloading of increased aggregates may impair another  
295 proteolytic system that is not inhibited by the drug, which changes the cytosolic environment to  
296 accelerate widespread protein aggregation. Although we did not completely demonstrated that

297 mitochondrial antioxidant enzymes, SOD2 and PGx4, form aggregations and are unable to  
298 translocate to the mitochondria, temporal reduction of these proteins in mitochondrial fraction (Fig.  
299 4A) may reflect the proteostasis stresses caused by protein aggregates. At the final stage of SIPS  
300 induction, protein aggregates were still detectable even at PD6 (Fig. 1E); nevertheless, proteasome  
301 activity and lysosome acidity have recovered at PD5 (data not shown), suggesting impaired protein  
302 clearance in senescent cells. Thus, it is likely that aggregated proteins accumulated at the late stage  
303 of senescence induction could be resistant to proteolysis by proteasome or lysosome. For the reason  
304 that we did not find autofluorescent pigments in any stage of SIPS cells, the aggresome-like particles  
305 that we observed might have different properties from those of lipofuscin. Artificial  
306 lipofuscin-loaded human fibroblast showed aged morphology [36]. To conclude whether these  
307 aggregated inclusion bodies could be a causal factor in SIPS by prolonged disturbance of  
308 proteostasis or not, we are, at present, analyzing the nature of the aggregates such as protein  
309 modification like carbonylation and ubiquitination, and phenotypes of these aggresome-induced  
310 cells.

311 In conclusion, disturbance of proteostasis changes distribution of nuclear-encoded  
312 mitochondrial antioxidant proteins at an early period of treatment, which enhances mitochondrial

313 ROS production and temporal mitochondrial dysfunction. ROS in turn activates stress responses  
314 including NRF1/2 and AMPK pathways, followed by PGC-1 $\alpha$ -mediated mitochondrial biogenesis.  
315 During the mid-stage of SIPS progression, excessive ROS is continuously generated from increased  
316 mitochondria, which can cause further cumulative damage to nuclear DNA and cell cycle arrest, and  
317 eventually lead to cellular senescence (Fig. 7).

318

## 319 **Materials and methods**

### 320 **Reagents**

321 MG132 and BAFA1 were purchased from ChemScene (Monmouth Junction, NJ) and Sigma-Aldrich  
322 (St. Louis, MO), respectively. Diaminofluorescein-FM diacetate (DAF-FM), OxiORANGE, and  
323 HYDROP were from Goryo Chemical (Sapporo, Japan). *N*-Acetyl-L-cysteine was from Fujifilm  
324 Wako Pure Chemical Corp (Osaka, Japan). Rapamycin was from LC Laboratories (Woburn, MA).

325

### 326 **Cell culture**

327 MRC-5 cells (30 PDL) were obtained from JCRB Cell Bank. Cells were maintained in EMEM  
328 (Fujifilm Wako Pure Chemical Corp, Osaka, Japan) supplemented with 10% fetal bovine serum

329 (Biological Industries, Cromwell, CT) and penicillin-streptomycin (Nacalai tesque, Kyoto, Japan) at  
330 37°C in a humidified atmosphere of 5% CO<sub>2</sub>. Cells were passaged every 2 days.

331

### 332 **Cell growth assay**

333 For MG132 or BAFA1 treatment, we plated  $1 \times 10^4$  cells a well in a 96-well clear bottom black plate,  
334 allowed them to grow for 16-24 h, and then changed the culture medium to EMEM that contained  
335 MG132 or BAFA1. As a pilot experiment, we assessed the viability of cells treated with MG132  
336 (0.1-1  $\mu$ M) or BAFA1 (2-15 nM) at several different concentrations to determine the appropriate  
337 concentration of each drug. On day 5 of drug treatment, the culture medium was replaced with  
338 regular EMEM that contained no drug.

339

### 340 **Immunoblotting and antibodies**

341 Cells cultured in 6-cm dishes were trypsinized and harvested. Cell pellets were lysed in modified  
342 RIPA buffer (20 mM Tris-HCl, pH7.4, 50 mM NaCl, 0.5% Nonidet P-40, 0.05% sodium dodecyl  
343 sulfate (SDS), 1 mM EDTA). Protein concentration was determined using Quick Start Bradford dye  
344 (Bio-Rad, Hercules, CA). Whole cell extracts (10-15  $\mu$ g) were mixed with 5 $\times$ SDS sample buffer

345 containing 2-mercaptoethanol, heated at 95°C for 3 min, and then loaded onto a  
346 SDS-polyacrylamide gel. Proteins were transferred to a PVDF membrane and incubated in 1%  
347 Western blocking reagent (Sigma-aldrich, St. Louis, MO) at 25°C for 1 hr. The membrane was then  
348 incubated overnight with antibodies diluted in 0.5% Western blocking reagent. Antibodies used in  
349 this study are summarized in a supplemental file. HRP-conjugated goat anti-mouse IgG  
350 (Sigma-Aldrich) or anti-rabbit IgG (GE healthcare, Piscataway, NJ) antibodies were used as the  
351 secondary antibodies and detected with ECL prime reagent (GE Healthcare). The  
352 chemiluminescence signal was imaged by LAS4000 (GE Healthcare).

353

#### 354 **SA- $\beta$ -gal staining and senescence assays**

355 SA- $\beta$ -gal staining was performed as described previously [9]. Quantitation of SA- $\beta$ -gal activity was  
356 assessed using a Cellular Senescence Plate Assay Kit - SPiDER- $\beta$ Gal (Dojindo, Kumamoto, Japan),  
357 following the manufacturer's instructions.

358

#### 359 **Immunofluorescence**

360 For immunofluorescence analyses of  $\gamma$ H2A.X and SOD2, cells were fixed in 4%

361 paraformaldehyde/PBS, treated with 0.5% Triton X-100/PBS for 10 min, incubated in Blocking One  
362 Histo (Nacalai tesque) for 1 h, and incubated with diluted primary antibody overnight. After several  
363 PBS washes, cells were incubated with a secondary antibody conjugated to DyLight 488 (Cosmo  
364 Bio Co., Ltd., Tokyo, Japan) and Hoechst 33342, and observed under a fluorescence microscope  
365 IX83 (Olympus, Tokyo, Japan) using appropriate filter sets.

366

#### 367 **Measurement of ROS and NO**

368 Production of hydroxyl radical (OH) and hypochlorous acid (HClO) was measured using  
369 OxiORANGE reagent (Goryo Chemical). H<sub>2</sub>O<sub>2</sub> and NO were detected by HYDROP and  
370 diaminofluorescein-FM diacetate (DAF-FM DA, Goryo Chemical), respectively. Cells plated in a  
371 96-well Black IsoPlate (PerkinElmer, Waltham, MA) were incubated with 0.5 μM OxiORANGE, 1  
372 μM HYDROP or 1 μM DAF-FM DA diluted in EMEM containing FBS for 30 min at 37°C, and  
373 then washed with 100 μl HBSS once. Fluorescence (Ex/Em = 535/595 nm for OxiORANGE,  
374 485/535 nm for HYDROP and DAF-FM DA) was measured by FilterMax F5 (Molecular Devices,  
375 San Jose, CA). Normalized values were obtained by dividing fluorescent intensities of HYDROP  
376 and DAF-FM DA by protein concentration or dividing the fluorescent intensities of of OxiORANGE



377 by nuclear fluorescent signal stained with Hoechst 33342 (Dojindo).

378

### 379 **Staining of protein aggregation**

380 Protein aggregation was visualized by Proteostat Aggresome Detection Reagent (Enzo Life Science,

381 Farmingdale, NY), according to the manufacturer's protocol. For the quantitative analysis, cells

382 plated in 96-well black plates were fixed with 2% PFA, permeabilized with 0.5% Triton X-100, and

383 stained with Proteostat Aggresome Detection Reagent diluted in EMEM containing FBS at 1:2,000

384 for 30 min at 25°C, then fluorescence was measured ( $E_x/E_m = 485/595$  nm) using FilterMax F5

385 (Molecular Devices).

386

### 387 **Intracellular ATP assay**

388 Intracellular ATP levels were measured using "Cell" ATP Assay reagent (Toyo B-Net, Tokyo,

389 Japan). The ATP level was normalized by the DNA content in cell lysates, which was quantified by

390 SYBR Gold stain (Thermo Fisher Scientific, Waltham, MA).

391

### 392 **Preparation of mitochondrial fraction**

393 The procedure for isolation of mitochondrial fraction from cultured cells is as described by Clayton *et al*  
394 [37] with slight modifications. The buffer volume, number of strokes, homogenizer, and pestle used were  
395 optimized for  $0.5-1.0 \times 10^6$  cells. Frozen cell pellets were resuspended in hypotonic buffer and  
396 homogenized using a disposable plastic pestle (As One Corp., Osaka, Japan) with matched Safe-Lock  
397 tubes (Eppendorf, Hamburg, Germany). The detailed procedure is summarized in Fig. S4A-C.

398

#### 399 **Live cell microscopy for mitochondrial analyses**

400 For the detection of mitochondrial mass and  $\Delta\Psi_m$ , live cells were incubated with  $0.5 \mu\text{M}$   
401 MitoTracker Green FM (Thermo Fisher Scientific) and  $0.5 \mu\text{M}$  MitoTracker Red CM-H2Xros  
402 (Thermo Fisher Scientific) with  $2 \mu\text{g/mL}$  Hoechst 33342 diluted in EMEM containing FBS for 30  
403 min at  $37^\circ\text{C}$ , and then washed with  $100 \mu\text{l}$  HBSS once. For the detection of mitochondrial ROS,  
404 cells were incubated with  $5 \mu\text{M}$  MitoSOX Red mitochondrial superoxide indicator (Thermo Fisher  
405 Scientific) in HBSS for 10 min at  $37^\circ\text{C}$ , washed with HBSS 3 times, and cultured in regular medium  
406 for 24 h. On the next day, cells were stained with Hoechst 33342, washed with  $100 \mu\text{l}$  HBSS once,  
407 and observed under an all-in-one fluorescence microscope BZ-9000 (Keyence, Osaka, Japan) using  
408 appropriate filter sets. Fluorescence images were analyzed and quantified using ImageJ software ver.

409 2.0.0.

410

#### 411 **Statistical analyses**

412 We conducted one-way ANOVA followed by Tukey's multiple comparison test. Two groups were  
413 compared using a non-parametric Mann-Whitney *U* test. Differences between groups with a *p* value  
414 of <0.05 were considered significant. All data were analyzed using GraphPad Prism 5.0 software  
415 and presented as mean ± SD of the obtained values.

416

#### 417 **Acknowledgement**

418 We are grateful to Santa Cruz Biotechnology, Inc. (Dallas, Tx) and Cosmo Bio Co., Ltd. (Tokyo,  
419 Japan) for providing sample antibodies listed in Antibodies used in this study. We would like to  
420 thank Editage ([www.editage.jp](http://www.editage.jp)) for English language editing.

421

#### 422 **AUTHOR CONTRIBUTIONS**

423 Y. T. and Y. K. designed the research and drafted the paper; Y. T. carried out experiments and  
424 analyzed data; and I. I., T. N., and M. I. supported analysis of oxidative stress.

425

426 **FUNDING INFO**

427 This work was supported by a Nippon Medical School Grant-in-Aid for Medical Research 2019.

428

429 **CONFLICT OF INTEREST**

430 The authors have no conflicts of interest to declare in association with this study.

431

432 **REFERENCES**

433 1. Hayashi, T. & Goto, S. (1998) Age-related changes in the 20S and 26S proteasome activities in the

434 liver of male F344 rats, *Mech Ageing Dev.* **102**, 55-66.

435 2. Ishigami, A. & Goto, S. (1990) Age-related change in the degradation rate of ovalbumin

436 microinjected into mouse liver parenchymal cells, *Arch Biochem Biophys.* **277**, 189-95.

437 3. Hwang, J. S., Hwang, J. S., Chang, I. & Kim, S. (2007) Age-associated decrease in proteasome

438 content and activities in human dermal fibroblasts: restoration of normal level of proteasome subunits

439 reduces aging markers in fibroblasts from elderly persons, *J Gerontol A Biol Sci Med Sci.* **62**, 490-9.

440 4. Reeg, S. & Grune, T. (2015) Protein Oxidation in Aging: Does It Play a Role in Aging Progression?,

- 441 *Antioxid Redox Signal.* **23**, 239-55.
- 442 5. Hohn, A. & Grune, T. (2013) Lipofuscin: formation, effects and role of macroautophagy, *Redox Biol.*
- 443 **1**, 140-4.
- 444 6. Chang, B. D., Watanabe, K., Broude, E. V., Fang, J., Poole, J. C., Kalinichenko, T. V. & Roninson, I.
- 445 B. (2000) Effects of p21Waf1/Cip1/Sdi1 on cellular gene expression: implications for carcinogenesis,
- 446 senescence, and age-related diseases, *Proc Natl Acad Sci U S A.* **97**, 4291-6.
- 447 7. Hasty, P., Sharp, Z. D., Curiel, T. J. & Campisi, J. (2013) mTORC1 and p53: clash of the gods?, *Cell*
- 448 *Cycle.* **12**, 20-5.
- 449 8. Leontieva, O. V., Gudkov, A. V. & Blagosklonny, M. V. (2010) Weak p53 permits senescence
- 450 during cell cycle arrest, *Cell Cycle.* **9**, 4323-7.
- 451 9. Dimri, G., Lee, X., Basile, G., Acosta, M., Scott, G., Roskelley, C., Medrano, E., Linskens, M.,
- 452 Rubelj, I. & Pereira-Smith, O. (1995) A biomarker that identifies senescent human cells in culture and in
- 453 aging skin in vivo, *Proc Natl Acad Sci U S A.* **92**, 9363-7.
- 454 10. Maejima, Y., Adachi, S., Ito, H., Hirao, K. & Isobe, M. (2008) Induction of premature senescence
- 455 in cardiomyocytes by doxorubicin as a novel mechanism of myocardial damage, *Aging Cell.* **7**, 125-36.
- 456 11. Moiseeva, O., Bourdeau, V., Roux, A., Deschenes-Simard, X. & Ferbeyre, G. (2009) Mitochondrial

- 457 dysfunction contributes to oncogene-induced senescence, *Mol Cell Biol.* **29**, 4495-507.
- 458 12. Park, W. H. & Kim, S. H. (2012) MG132, a proteasome inhibitor, induces human pulmonary  
459 fibroblast cell death via increasing ROS levels and GSH depletion, *Oncol Rep.* **27**, 1284-91.
- 460 13. Maharjan, S., Oku, M., Tsuda, M., Hoseki, J. & Sakai, Y. (2014) Mitochondrial impairment triggers  
461 cytosolic oxidative stress and cell death following proteasome inhibition, *Sci Rep.* **4**, 5896.
- 462 14. Chao, T. H., Chang, M. Y., Su, S. J. & Su, S. H. (2014) Inducible nitric oxide synthase mediates  
463 MG132 lethality in leukemic cells through mitochondrial depolarization, *Free Radic Biol Med.* **74**,  
464 175-87.
- 465 15. Chondrogianni, N. & Gonos, E. S. (2004) Proteasome inhibition induces a senescence-like  
466 phenotype in primary human fibroblasts cultures, *Biogerontology.* **5**, 55-61.
- 467 16. Chondrogianni, N., Stratford, F. L., Trougakos, I. P., Friguet, B., Rivett, A. J. & Gonos, E. S. (2003)  
468 Central role of the proteasome in senescence and survival of human fibroblasts: induction of a  
469 senescence-like phenotype upon its inhibition and resistance to stress upon its activation, *J Biol Chem.*  
470 **278**, 28026-37.
- 471 17. Ukekawa, R., Maegawa, N., Mizutani, E., Fujii, M. & Ayusawa, D. (2004) Proteasome inhibitors  
472 induce changes in chromatin structure characteristic of senescent human fibroblasts, *Biosci Biotechnol*

473 *Biochem.* **68**, 2395-7.

474 18. Brand, M. D. (2016) Mitochondrial generation of superoxide and hydrogen peroxide as the source  
475 of mitochondrial redox signaling, *Free Radic Biol Med.* **100**, 14-31.

476 19. Wei, Y., Zhang, Y. J., Cai, Y. & Xu, M. H. (2015) The role of mitochondria in mTOR-regulated  
477 longevity, *Biol Rev Camb Philos Soc.* **90**, 167-81.

478 20. Lee, H. C., Yin, P. H., Chi, C. W. & Wei, Y. H. (2002) Increase in mitochondrial mass in human  
479 fibroblasts under oxidative stress and during replicative cell senescence, *J Biomed Sci.* **9**, 517-26.

480 21. Passos, J. F., Nelson, G., Wang, C., Richter, T., Simillion, C., Proctor, C. J., Miwa, S., Olijslagers,  
481 S., Hallinan, J., Wipat, A., Saretzki, G., Rudolph, K. L., Kirkwood, T. B. & von Zglinicki, T. (2010)  
482 Feedback between p21 and reactive oxygen production is necessary for cell senescence, *Mol Syst Biol.* **6**,  
483 347.

484 22. Huss, M. & Wiczorek, H. (2009) Inhibitors of V-ATPases: old and new players, *J Exp Biol.* **212**,  
485 341-6.

486 23. Cho, S. & Hwang, E. S. (2012) Status of mTOR activity may phenotypically differentiate  
487 senescence and quiescence, *Mol Cells.* **33**, 597-604.

488 24. Blagosklonny, M. V. (2011) Cell cycle arrest is not senescence, *Aging (Albany NY).* **3**, 94-101.

- 489 25. Takebayashi, S., Tanaka, H., Hino, S., Nakatsu, Y., Igata, T., Sakamoto, A., Narita, M. & Nakao, M.  
490 (2015) Retinoblastoma protein promotes oxidative phosphorylation through upregulation of glycolytic  
491 genes in oncogene-induced senescent cells, *Aging Cell*. **14**, 689-97.
- 492 26. Legesse-Miller, A., Raitman, I., Haley, E. M., Liao, A., Sun, L. L., Wang, D. J., Krishnan, N.,  
493 Lemons, J. M., Suh, E. J., Johnson, E. L., Lund, B. A. & Collier, H. A. (2012) Quiescent fibroblasts are  
494 protected from proteasome inhibition-mediated toxicity, *Mol Biol Cell*. **23**, 3566-81.
- 495 27. Rawat, S., Anusha, V., Jha, M., Sreedurgalakshmi, K. & Raychaudhuri, S. (2019) Aggregation of  
496 Respiratory Complex Subunits Marks the Onset of Proteotoxicity in Proteasome Inhibited Cells, *J Mol*  
497 *Biol*. **431**, 996-1015.
- 498 28. Morita, M., Gravel, S. P., Hulea, L., Larsson, O., Pollak, M., St-Pierre, J. & Topisirovic, I. (2015)  
499 mTOR coordinates protein synthesis, mitochondrial activity and proliferation, *Cell Cycle*. **14**, 473-80.
- 500 29. Ramanathan, A. & Schreiber, S. L. (2009) Direct control of mitochondrial function by mTOR, *Proc*  
501 *Natl Acad Sci U S A*. **106**, 22229-32.
- 502 30. Martinez-Cisuelo, V., Gomez, J., Garcia-Junceda, I., Naudi, A., Cabre, R., Mota-Martorell, N.,  
503 Lopez-Torres, M., Gonzalez-Sanchez, M., Pamplona, R. & Barja, G. (2016) Rapamycin reverses  
504 age-related increases in mitochondrial ROS production at complex I, oxidative stress, accumulation of



- 505 mtDNA fragments inside nuclear DNA, and lipofuscin level, and increases autophagy, in the liver of  
506 middle-aged mice, *Exp Gerontol.* **83**, 130-8.
- 507 31. Summer, R., Shaghghi, H., Schriener, D., Roque, W., Sales, D., Cuevas-Mora, K., Desai, V.,  
508 Bhushan, A., Ramirez, M. I. & Romero, F. (2019) Activation of the mTORC1/PGC-1 axis promotes  
509 mitochondrial biogenesis and induces cellular senescence in the lung epithelium, *Am J Physiol Lung Cell*  
510 *Mol Physiol.* **316**, L1049-L1060.
- 511 32. Leontieva, O. V., Demidenko, Z. N., Gudkov, A. V. & Blagosklonny, M. V. (2011) Elimination of  
512 proliferating cells unmasks the shift from senescence to quiescence caused by rapamycin, *PLoS One.* **6**,  
513 e26126.
- 514 33. Lerner, C., Bitto, A., Pulliam, D., Nacarelli, T., Konigsberg, M., Van Remmen, H., Torres, C. &  
515 Sell, C. (2013) Reduced mammalian target of rapamycin activity facilitates mitochondrial retrograde  
516 signaling and increases life span in normal human fibroblasts, *Aging Cell.* **12**, 966-77.
- 517 34. Nacarelli, T. & Sell, C. (2017) Targeting metabolism in cellular senescence, a role for intervention,  
518 *Mol Cell Endocrinol.* **455**, 83-92.
- 519 35. Korolchuk, V. I., Miwa, S., Carroll, B. & von Zglinicki, T. (2017) Mitochondria in Cell Senescence:  
520 Is Mitophagy the Weakest Link?, *EBioMedicine.* **21**, 7-13.

521 36. Nilsson, E. & Yin, D. (1997) Preparation of artificial ceroid/lipofuscin by UV-oxidation of  
522 subcellular organelles, *Mech Ageing Dev.* **99**, 61-78.

523 37. Clayton, D. A. & Shadel, G. S. (2014) Isolation of mitochondria from tissue culture cells, *Cold*  
524 *Spring Harb Protoc.* **2014**, pdb prot080002.

525

## 526 **Figure legends**

### 527 **Fig. 1**

528 Prolonged disturbance of proteostasis by MG132 or BAFA1 induces premature senescence in  
529 normal human fibroblasts. (A) The experimental design to induce SIPS in MRC-5 by MG132 or  
530 BAFA1. MRC-5 cells (37-40 PDL) were treated with 0.1-1  $\mu$ M MG132 or 2-15 nM BAFA1  
531 consecutively for 3 or 5 days without medium refreshment. On day 3 or 5, the drugs were removed  
532 and cells were kept in regular culture medium for additional 5 days. Day, days during the drug  
533 treatment; PD, post-treatment days. (B) Cell proliferation was monitored by measuring Hoechst  
534 33342 fluorescence from PD1 to PD6. Cells were treated with MG132 or BAFA1 for 3 or 5 days,  
535 and then cultured in medium without the drug for 6 days (PD1-6). Values are shown as mean  $\pm$  SD  
536 from 4 wells of a 96-well plate. The asterisk (\*) indicates  $p < 0.05$  by one-way ANOVA, followed  
537 by Tukey's multiple comparison test for PD1 vs. others. (C) Representative pictures of

538 SA- $\beta$ -gal-positive MRC-5 cells. Cells were treated with MG132 or BAF1A1 for 3 or 5 days,  
539 respectively, and stained at PD7 (cytoplasmic blue precipitate). Control, untreated young (39 PDL)  
540 and old (59 PDL) MRC-5 cells undergoing replicative senescence. (D) SA- $\beta$ -gal activity was  
541 measured using a SPiDER- $\beta$ Gal Cellular Senescence Plate Assay Kit. Fluorescence signal derived  
542 from SA- $\beta$ -gal was normalized by Hoechst 33342-stained nuclear signal. C, untreated control cells.  
543 Values are shown as mean  $\pm$  SD from 4 wells of a 96-well plate. The asterisk (\*) indicates  $p < 0.05$   
544 by one-way ANOVA, followed by Tukey's multiple comparison test for control vs. treated cells. (E)  
545 Representative images of accumulation of aggresome-like inclusion bodies in senescence-induced  
546 MRC-5 cells. Cells were treated with MG132 or BAF1A1 for 5 days, respectively, and stained with  
547 Proteostat Aggresome detection reagent (red) and Hoechst 33342 (blue). Scale bar = 50  $\mu$ m. (F)  
548 Representative images of control and MG132- or BAF1A1-treated MRC-5 cells immunostained for  
549  $\gamma$ H2A.X (green) and Hoechst 33342 (blue). Scale bar = 50  $\mu$ m. (G) Immunoblot analyses for CDK  
550 inhibitor p21, p53, DNA damage response marker  $\gamma$ H2A.X, downstream target of mTORC1 S6 and  
551 phosphorylated S6<sup>Thr235/236</sup>, autophagy marker LC3, and GAPDH from control and MG132- or  
552 BAF1A1-treated MRC-5 cells. (H) Immunoblot analyses for NRF1 and NRF2 from control and  
553 MG132- or BAF1A1-treated MRC-5 cells.

554

555 **Fig. 2**

556 Prolonged disturbance of proteostasis by MG132 or BAFA1 enhances ROS production. (A)

557 Quantitation of relative intracellular ROS levels using OxiORANGE reagent that selectively detects

558 hydroxyl radical ( $\cdot\text{OH}$ ) and hypochlorous acid ( $\text{HClO}$ ). The fluorescence intensity for OxiORANGE

559 ( $\text{Ex/Em} = 535/595$ ) was normalized by Hoechst 33342 intensity ( $\text{Ex/Em} = 340/465$ ). Values are

560 shown as mean  $\pm$  SD from 4 wells of a 96-well plate. The asterisk (\*) indicates  $p < 0.05$  by one-way

561 ANOVA, followed by Tukey's multiple comparison test for control vs. treated cells. (B)

562 Representative images of control and MG132- or BAFA1-treated (PD1) MRC-5 cells stained for the

563 OxiORANGE (red) and Hoechst 33342 (blue). Scale bar = 50  $\mu\text{m}$ . (C) Quantitation of relative

564 intracellular  $\text{H}_2\text{O}_2$  levels using HYDROP reagent that selectively detects  $\text{H}_2\text{O}_2$ . The fluorescence

565 intensity for HYDROP was normalized by total protein concentration. Values are shown as mean  $\pm$

566 SD from 4 wells of a 96-well plate. (D) Representative images of control and MG132- or

567 BAFA1-treated (PD1) MRC-5 cells stained for the HYDROP (green) and Hoechst 33342 (blue).

568 Scale bar = 50  $\mu\text{m}$ . (E) Relative mitochondrial ROS levels were monitored using a MitoSOX Red

569 mitochondrial superoxide indicator. The fluorescence intensities for MitoSOX and Hoechst 33342

570 were quantified by image analysis. MitoSOX intensity was normalized by the number of nuclei.  
571 Values are shown as mean  $\pm$  SD from the measurements of 4 different images. The asterisk (\*)  
572 indicates  $p < 0.05$  by one-way ANOVA, followed by Tukey's multiple comparison test for control  
573 vs. treated cells. Values obtained from cells treated with MG132 or BAF1A1 on day 1 were compared  
574 with those from untreated control cells using a non-parametric Mann-Whitney  $U$  test. The sharp (#)  
575 indicates significant difference ( $p < 0.05$ ). (F) Representative images of control and MG132- or  
576 BAF1A1-treated (PD3) MRC-5 cells stained for MitoSOX (red) and Hoechst 33342 (blue).

577

578 **Fig. 3**

579 Prolonged disturbance of proteostasis by MG132 or BAF1A1 induces temporal mitochondrial  
580 dysfunction and sequential mitochondrial biogenesis. (A) Relative mitochondrial mass was  
581 monitored using MitoTracker Green FM. The fluorescence intensities for MitoTracker Green and  
582 Hoechst 33342 were quantified by image analysis. MitoTracker Green intensity was normalized by  
583 the number of nuclei. Values are shown as mean  $\pm$  SD from the measurements of 5 different images.  
584 The asterisk (\*) indicates  $p < 0.05$  by one-way ANOVA, followed by Tukey's multiple comparison  
585 test for control vs. treated cells. (B) Relative mitochondrial membrane potential ( $\Delta\Psi_m$ ) was

586 monitored using MitoTracker Red CM-H<sub>2</sub>XRos. The fluorescence intensities for MitoTracker Red  
587 CM-H<sub>2</sub>XRos and Hoechst 33342 were quantified by image analysis. MitoTracker Red CM-H<sub>2</sub>XRos  
588 intensity was normalized by the number of nuclei. Values are shown as mean  $\pm$  SD from the  
589 measurements of 10 different images. The asterisk (\*) indicates  $p < 0.05$  by one-way ANOVA  
590 followed by Tukey's multiple comparison test for control vs. treated cells. (C) Representative  
591 images of control and MG132- or BAF1A1-treated (day 5 and PD1) MRC-5 cells stained for the  
592 MitoTracker Green FM (Mt mass, green), MitoTracker Red CM-H<sub>2</sub>XRos ( $\Delta\Psi_m$ , Red) and Hoechst  
593 33342 (blue). (D) The copy number of mitochondrial DNA of control and MG132- or  
594 BAF1A1-treated MRC-5 cells was measured by qPCR using mtDNA-specific primers and nuclear  
595 DNA-specific primers as a reference. Values are mean  $\pm$  SD of results obtained from 3-4  
596 independent experiments. The asterisk (\*) indicates  $p < 0.05$  by one-way ANOVA, followed by  
597 Tukey's multiple comparison test for control vs. treated cells. (E) Intracellular ATP contents were  
598 measured using a firefly luciferase. The luminescence was normalized by cellular DNA  
599 concentration quantified using SYBR Gold. Values are shown as mean  $\pm$  SD from 4 wells of a  
600 96-well plate. The asterisk (\*) indicates  $p < 0.05$  by one-way ANOVA, followed by Tukey's  
601 multiple comparison test for control (37 PDL) vs. treated cells. (F) Immunoblot analyses for

602 PGC-1 $\alpha$ , TFAM, Parkin, AMPK $\alpha$ , phosphorylated AMPK $\alpha^{\text{Thr172}}$  (p-AMPK $\alpha$ ), COX4 and GAPDH  
603 from control and MG132 (left)- or BAFA1 (right)-treated MRC-5 cells.

604

605 **Fig. 4**

606 Translocation of antioxidant enzymes to mitochondria is impaired in the early period of MG132 or  
607 BAFA1 treatment in MRC-5 cells. (A) Immunoblot analyses for mitochondrial antioxidant enzymes  
608 SOD2 and GPx4, NDUFS3, Tom40, and GAPDH from control and MG132 (left)- or BAFA1  
609 (right)-treated MRC-5 cells. Mt, mitochondrial fraction; Whole, whole cellular extract. (B)  
610 Representative images of control and MG132- or BAFA1-treated MRC-5 cells on day 1  
611 immunostained for SOD2 (green) and Hoechst 33342 (blue). Scale bar = 50  $\mu\text{m}$ .

612

613 **Fig. 5**

614 Rapamycin attenuates cellular senescence induced by MG132 or BAFA1. (A) The experimental  
615 design for co-treatment of 10 nM rapamycin with MG132 or BAFA1 in MRC-5. Rapa1, cells were  
616 co-treated with rapamycin and either MG132 or BAFA1 from day 0 to day 5. Rapa2, cells were  
617 co-treated with rapamycin and either MG132 or BAFA1 from day 3 to day 5, and continuously

618 cultured in regular medium containing rapamycin from day 5 to PD3. (B) Cell proliferation was  
619 monitored by measuring Hoechst 33342 fluorescence from PD5 to PD10. Values are shown as mean  
620  $\pm$  SD from 4 wells of a 96-well plate. (C) SA- $\beta$ -gal activities of cells co-treated with rapamycin and  
621 either MG132 or BAFA1 were measured on PD5 using a SPiDER- $\beta$ Gal Cellular Senescence Plate  
622 Assay Kit. Normalized values are shown as mean  $\pm$  SD from 4 wells of a 96-well plate. Values  
623 obtained from cells treated with rapamycin and either MG132 or BAFA1 (Rapa1 and Rapa2) were  
624 compared with those from cells treated with only MG132 or BAFA1 (-) using a non-parametric  
625 Mann-Whitney *U* test. The asterisk (\*) indicates significant difference ( $p < 0.05$ ). (D, E) Intracellular  
626 H<sub>2</sub>O<sub>2</sub> levels of cells co-treated with rapamycin and either MG132 or BAFA1 were measured on day  
627 3, day 5, and PD3 by HYDROP staining. Normalized values are shown as mean  $\pm$  SD from 4 wells  
628 of a 96-well plate. Two groups were compared using a non-parametric Mann-Whitney *U* test ( $*p <$   
629 0.05). (F) Relative mitochondrial mass of cells co-treated with rapamycin and either of MG132 or  
630 BAFA1 was measured on PD1 (MG132) and PD2 (BAFA1) using MitoTracker Green FM. Values  
631 are shown as mean  $\pm$  SD from the measurements of 4 different images. Two groups were compared  
632 using a non-parametric Mann-Whitney *U* test ( $*p < 0.05$ ). (G) Relative mitochondrial ROS levels of  
633 cells co-treated with rapamycin (+Rapa) and either of MG132 or BAFA1 were measured on day 1



634 (MG132) and day 2 (BAFA1). The MitoSOX intensity was normalized by the number of nuclei.  
635 Values are shown as mean  $\pm$  SD from the measurements of 4 different images. Two groups were  
636 compared using a non-parametric Mann-Whitney *U* test ( $*p < 0.05$ ). (H) Immunoblot analyses for  
637 SOD2, GPx4, Tom40, and GAPDH from MG132- or BAFA1-treated cells with (+Rapa) or without  
638 (-Rapa) rapamycin on day 1. Mt, mitochondrial fraction; Whole, whole cellular extract.

639

640 **Fig. 6**

641 NAC attenuates an increase in mitochondrial mass induced by MG132 or BAFA1. (A) The  
642 experimental design for co-treatment of *N*-acetyl-L-cysteine (NAC) with MG132 or BAFA1 in  
643 MRC-5 cells. NAC1-3, cells were co-treated with 5 mM NAC and either of MG132 or BAFA1 from  
644 day 0 to day 2 (NAC1), day 2 to day 4 (NAC2), or day 5 to PD1 (NAC3, only NAC treatment during  
645 day 5 to PD1). (B) Relative mitochondrial mass of cells co-treated with NAC and either MG132 or  
646 BAFA1 was measured on PD1 (MG132) and PD2 (BAFA1) using MitoTracker Green FM. Values  
647 are shown as mean  $\pm$  SD from the measurements of 6 different images. Two groups were compared  
648 using a non-parametric Mann-Whitney *U* test ( $*p < 0.05$ ).

649

650 **Fig. 7**

651 Speculative scheme of SIPS induced by MG132 or BAFA1. Upper panel shows mitochondrial  
652 events during SIPS progression induced by MG132 or BAFA1. Disturbance of proteostasis changes  
653 distribution of nuclear-encoded mitochondrial proteins including antioxidant enzymes SOD2 and  
654 GPx4 at a very early period of the treatment, which induces mitochondrial ROS and temporal  
655 mitochondrial dysfunction. ROS in turn activates stress response pathway including NRF1 and  
656 NRF2 upregulation, followed by PGC-1 $\alpha$ -mediated mitochondrial biogenesis. During mid-stage of  
657 SIPS progression, excessive ROS was continuously generated from increased mitochondria, which  
658 could cause deleterious damage to nuclear DNA and cell cycle arrest, and eventually lead to cellular  
659 senescence. Lower panel summarizes kinetics of cellular outcomes including levels of SA- $\beta$ -gal  
660 activity, DNA damage response, overall ROS, protein aggregation, and autophagic flux.

661

662

663

## Antibodies used in this study

### 1st antibodies

anti-p21 (SX118, sc-53870, Santa Cruz Biotechnology, mouse monoclonal)  
anti-S6 (C-8, sc-74459, Santa Cruz Biotechnology, mouse monoclonal)  
anti-p-S6 (50.Ser 235/236, sc-293144, Santa Cruz Biotechnology)  
anti-p53 (DO-1, sc-126, Santa Cruz Biotechnology, mouse monoclonal)  
anti-p-Histone H2A.X (Ser 139, sc-517348, Santa Cruz Biotechnology, mouse monoclonal)  
anti-mtTFA (TFAM)(C-9, sc-376672, Santa Cruz Biotechnology, mouse monoclonal)  
anti-PGC-1 $\alpha$  (D-5, sc-518025, Santa Cruz Biotechnology, mouse monoclonal)  
anti-Parkin (PRK8, sc-32282, Santa Cruz Biotechnology)  
anti-SOD2 (A-2, sc-133134, Santa Cruz Biotechnology)  
anti-GPx-4 (E-12, sc-166570, Santa Cruz Biotechnology, mouse monoclonal)  
anti-NDUFS3 (D-4, sc-374282, Santa Cruz Biotechnology, mouse monoclonal)  
anti-Tom40 (D-2, sc-365467, Santa Cruz Biotechnology, mouse monoclonal)  
anti-NRF1 (G-5, sc-515360, Santa Cruz Biotechnology, mouse monoclonal)  
anti-NRF2 (M200-3, Medical & Biological Laboratories Co., ltd., Japan, mouse monoclonal)  
anti-Cox-4 (#3638-100, BioVision)  
anti-LC3 (PM036, MBL Life Science)  
anti-GAPDH (G8795, Sigma-aldrich)  
anti-p-AMPK $\alpha$  (#2535, Cell Signaling Technology)  
anti-AMPK $\alpha$  (#2532, Cell Signaling Technology)

### 2nd antibodies

HRP-conjugated goat anti-mouse IgG (A9044, Sigma-Aldrich)  
HRP-conjugated anti-rabbit IgG (NA934, GE healthcare)

### Luminescent signal detection

The luminescence signal by HRP on membrane was imaged with ECL prime reagent (GE Healthcare).

# Figure 1

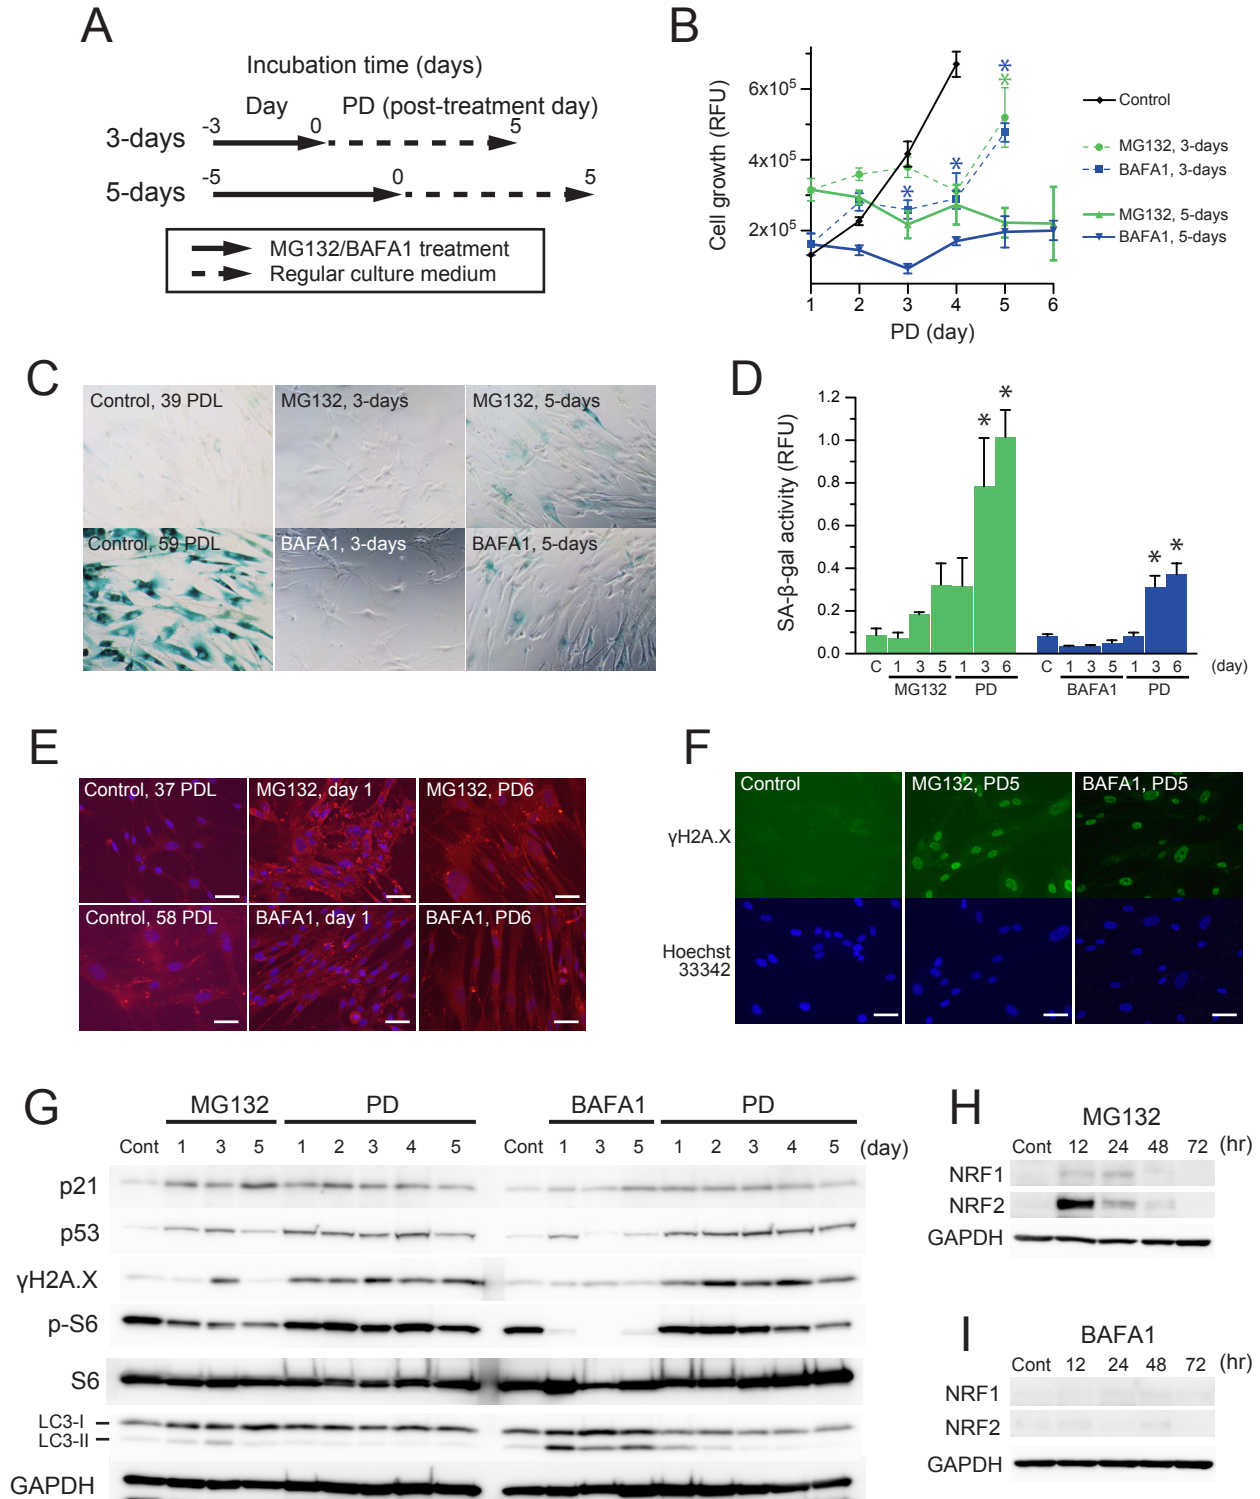

# Figure 2

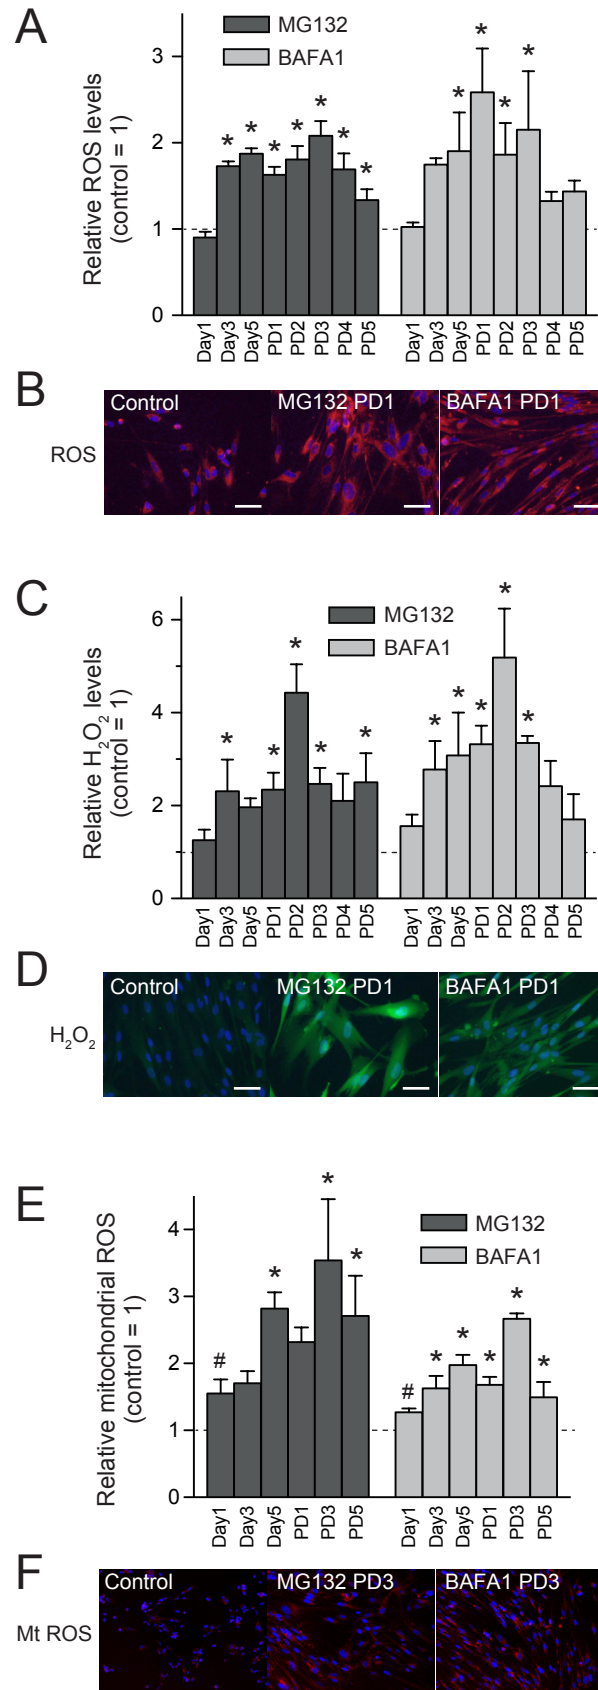

# Figure 3

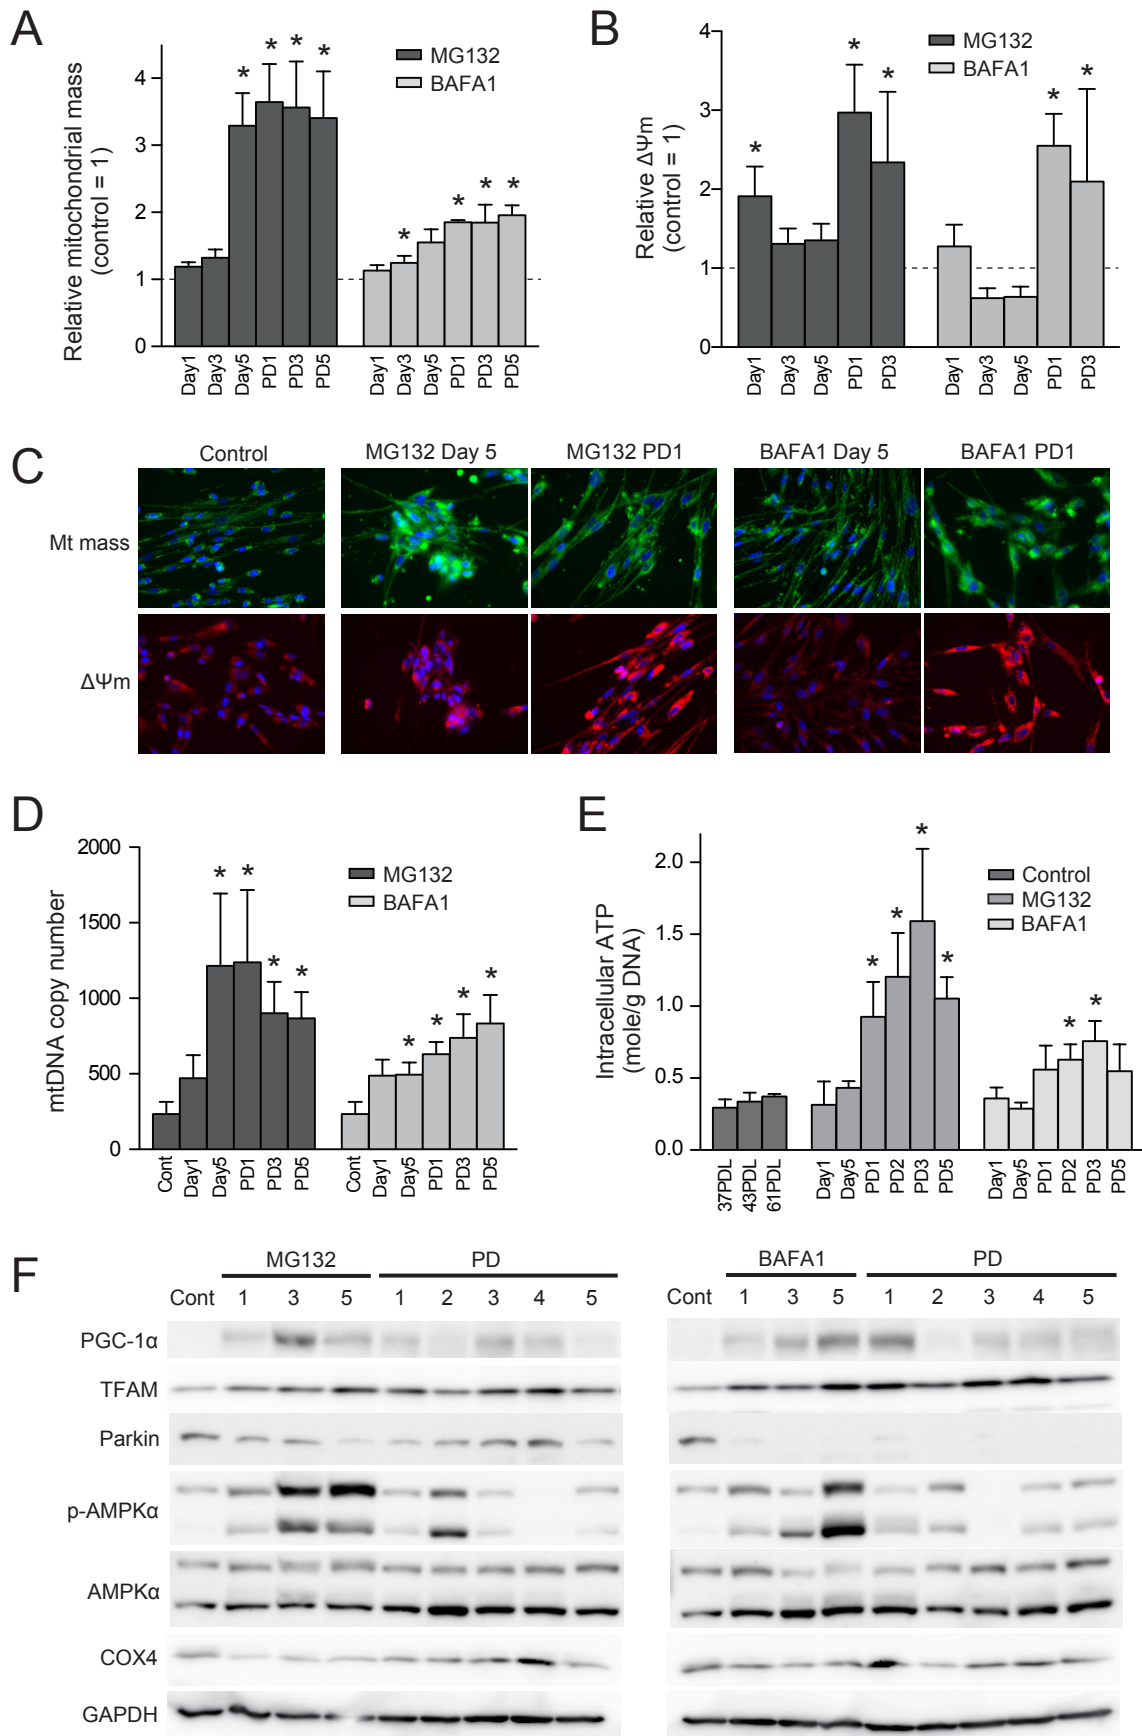

# Figure 4

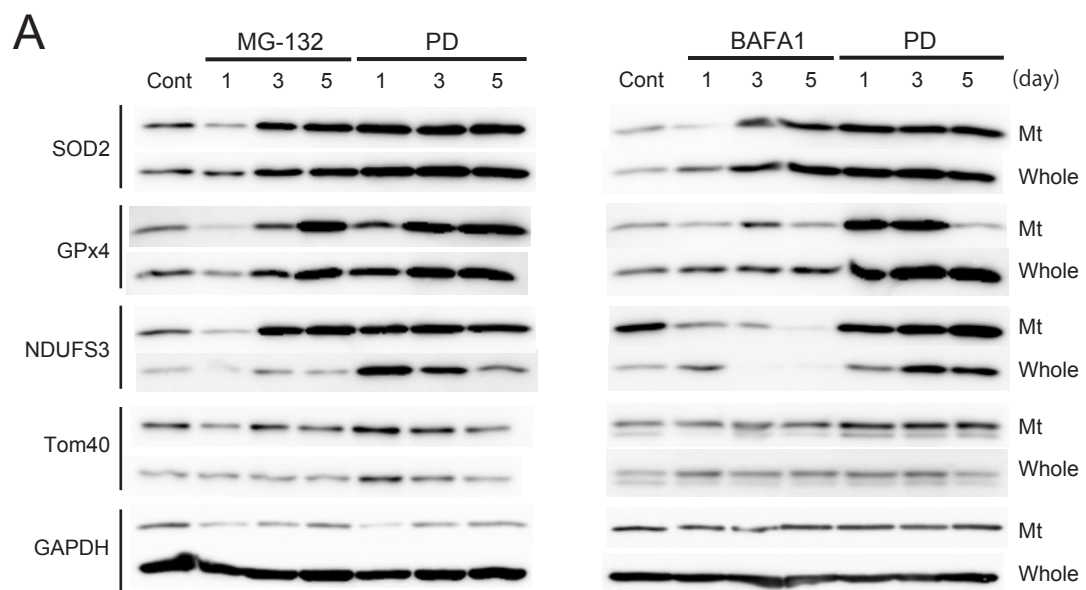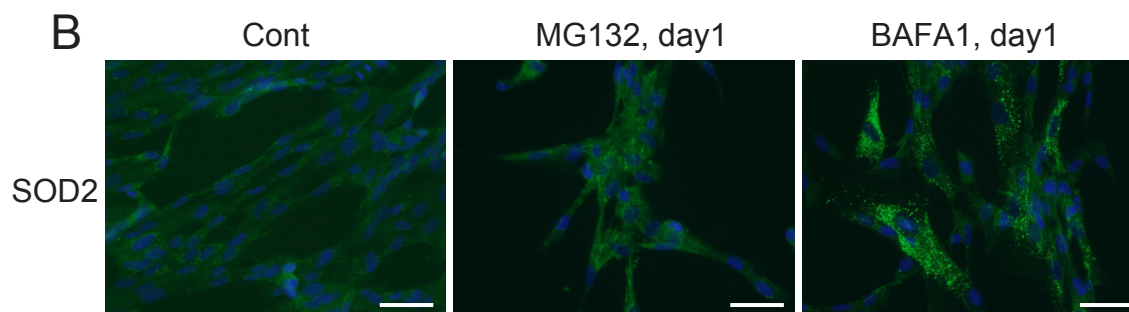

# Figure 5

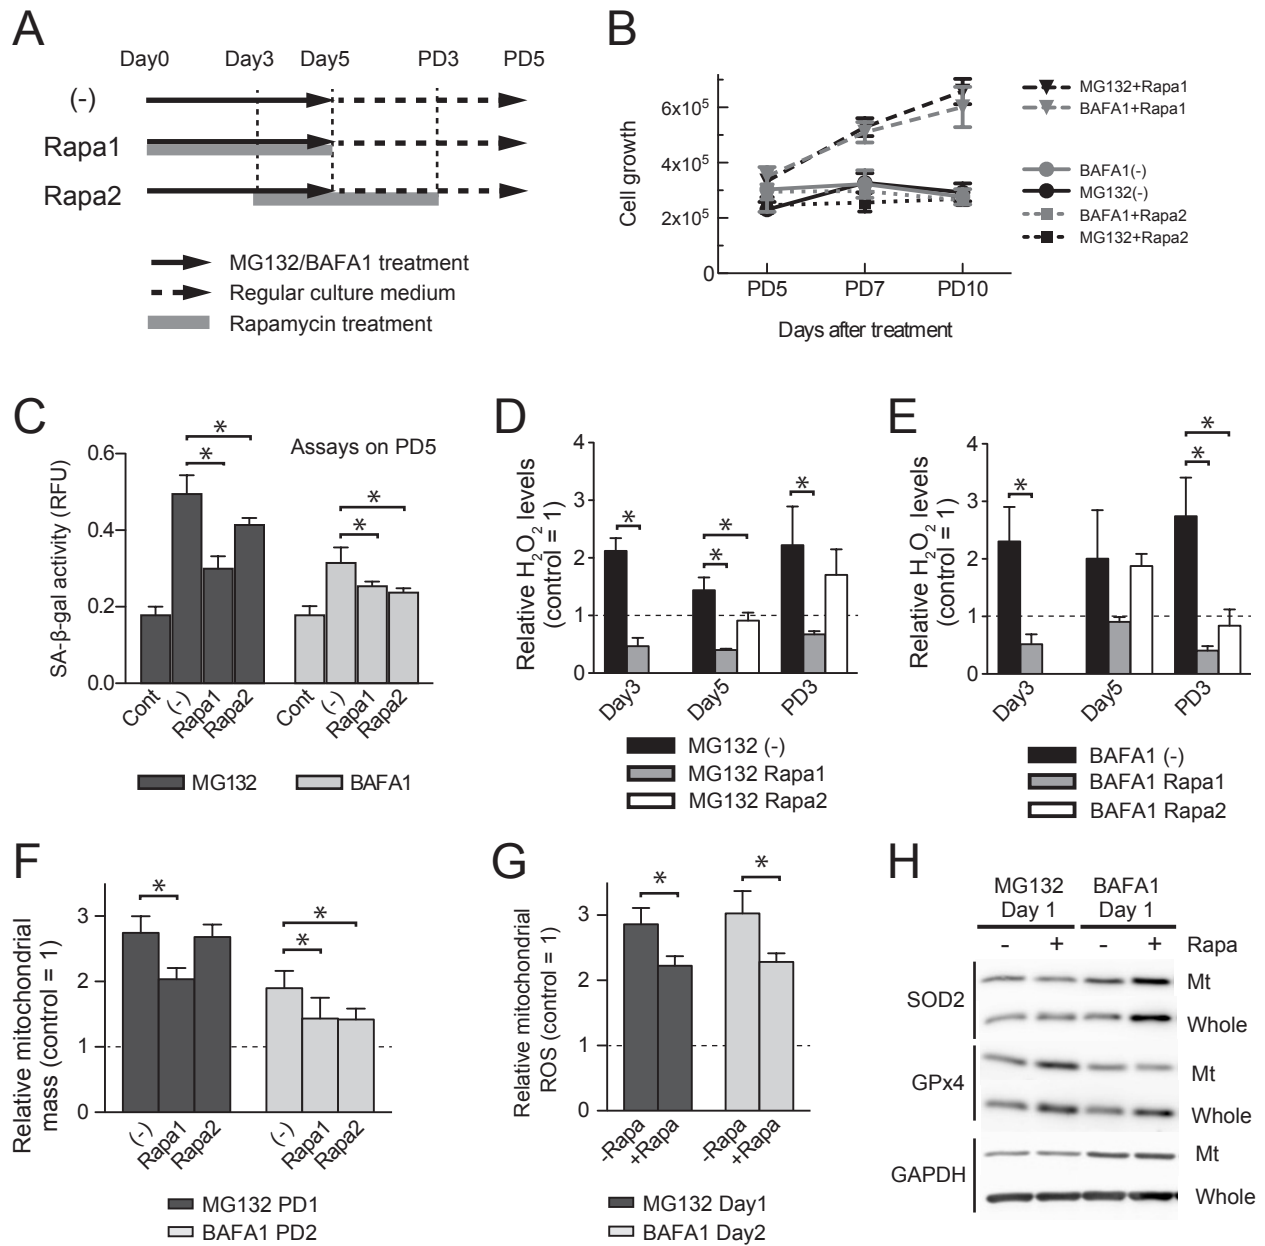



# Figure 6

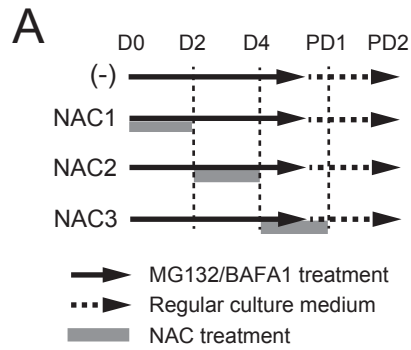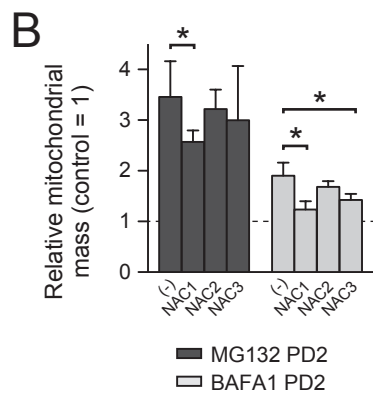

# Figure 7

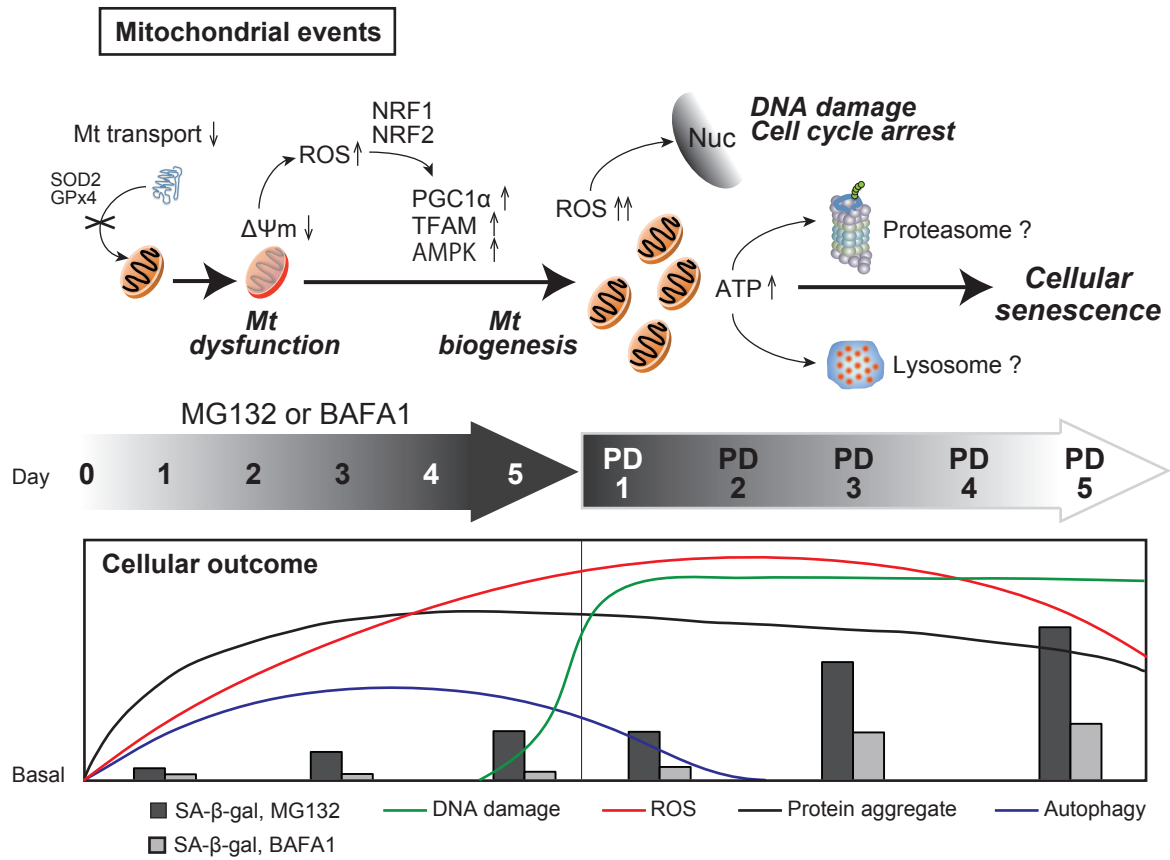

# Figure S1

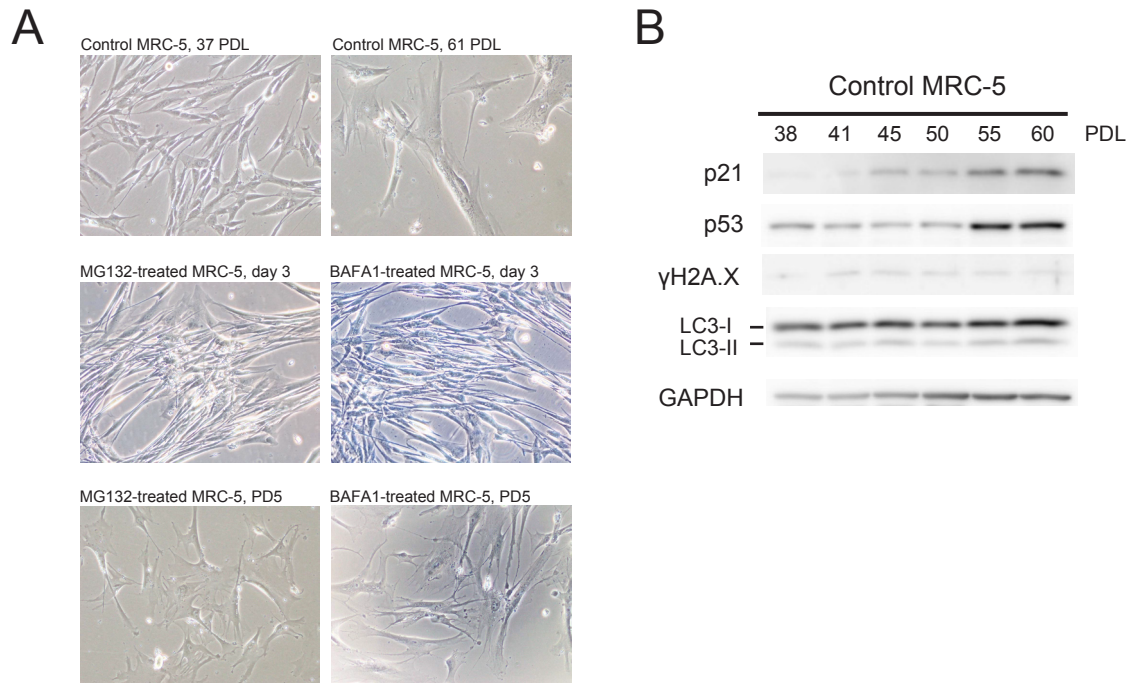

(A) Representative pictures of senescence-induced MRC-5 cells by MG132 or BAFA1 treatment (day 3 and PD5) with young (37 PDL) and aged (61 PDL) control cells.

(B) Immunoblot analysis of untreated control MRC-5 cells undergoing replicative senescence (from 38 to 60 PDL) using antibodies against p21, p53,  $\gamma$ H2A.X, LC3,

# Figure S2

A

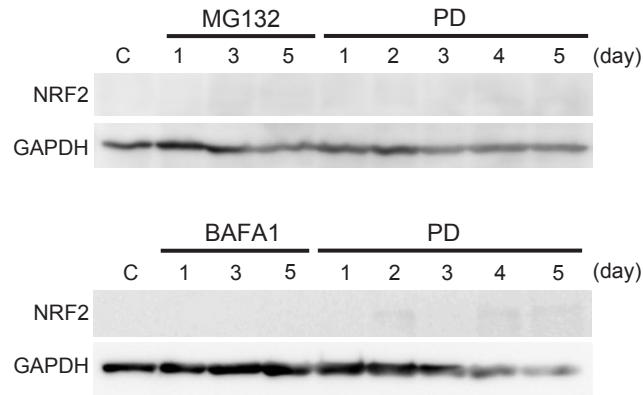

B

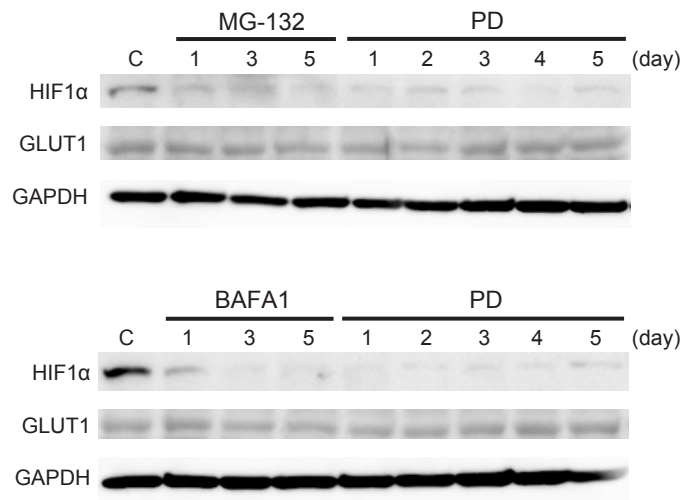

(A) Immunoblot analyses of MG132- or BAFA1-treated cells using antibodies against NRF2 and GAPDH. C, untreated control cells.

(B) Immunoblot analyses of MG132- or BAFA1-treated cells using antibodies against HIF1 $\alpha$ , GLUT1, and GAPDH. C, untreated control cells.

# Figure S3

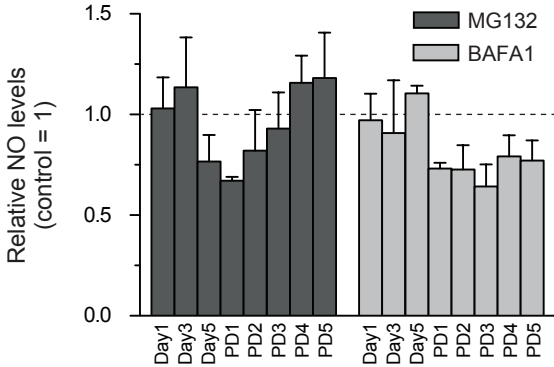

Quantitation of relative intracellular NO levels by using DAF-FM DA fluorescent dye that selectively detects NO. The fluorescence intensity for DAF-FM DA was normalized by total protein concentration. Values are shown as mean  $\pm$  SD from 4 wells of a 96-well plate.

# Figure S4

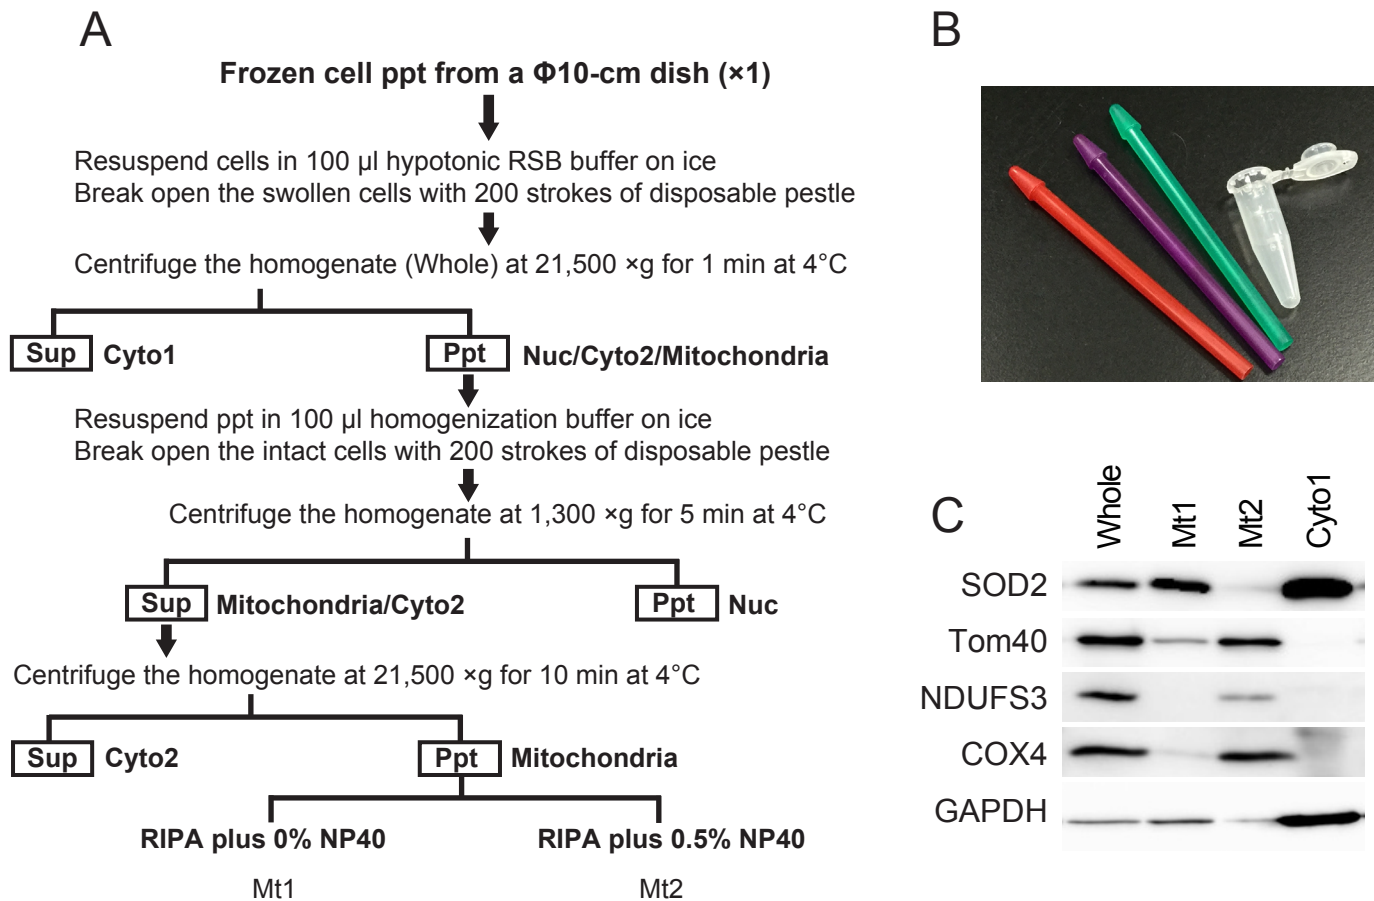

(A) Detailed procedure for preparation of mitochondrial fraction from frozen cell pellet at a microscale. Cells were homogenized in hypotonic RSB buffer, then unbroken cells were repeatedly homogenized in a homogenization buffer. For the immunoblot analyses, solubilized mitochondrial protein in RIPA buffer containing 0.5% NP40 (Mt2) was applied. Hypotonic RSB buffer, 10 mM Tris-HCl, pH7.4, 10 mM NaCl, 1.5 mM MgCl<sub>2</sub>, protease inhibitor; Homogenization buffer, 5 mM Tris-HCl, pH7.4, 1.5 mM MgCl<sub>2</sub>, 250 mM sucrose, protease inhibitor; RIPA plus 0% NP40, 20 mM Tris-HCl, pH7.4, 50 mM NaCl, 1 mM EDTA, protease inhibitor; RIPA plus 0.5% NP40, 20 mM Tris-HCl, pH7.4, 50 mM NaCl, 0.5% Nonidet P-40, 0.05% SDS, 1 mM EDTA, protease inhibitor; Cyto, cytoplasmic fraction; Nuc, nuclear fraction; Whole, whole cellular extract. (B) Disposable plastic pestles and a matched Safe-Lock tube used in this method. (C) Immunoblot analyses of whole cellular extract (Whole), mitochondrial fractions 1 and 2 (Mt1 and 2), and cytoplasmic fraction (Cyto1) prepared from untreated control MRC5 cells using antibodies against SOD2, Tom40, NDUFS3, COX4, and GAPDH.

## Figure S5

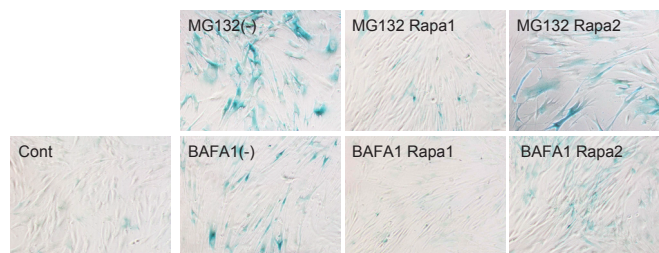

Representative pictures of SA- $\beta$ -gal positive MRC-5 cells. Cells were co-treated with rapamycin and either MG132 or BAFA1 for 5 days, respectively, and stained at PD5 (cytoplasmic blue precipitate). Control, untreated young (39 PDL) MRC-5 cells. (-), cells treated with only MG132 or BAFA1; Rapa1 and Rapa2, cells co-treated with rapamycin and either MG132 or BAFA1 as shown in Fig. 5A.

## Figure S6

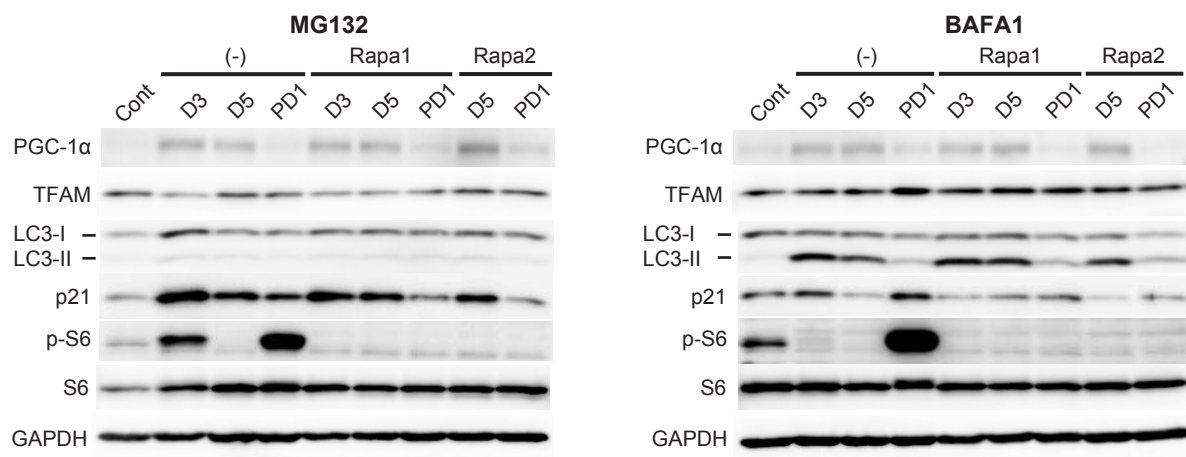

Immunoblot analyses of MG132 (left)- or BAFA1 (right)-treated cells with (Rapa1 and Rapa2) or without (-) rapamycin at day 3 (D3), day 5 (D5), and PD1.
